# Supplementary material for: Nanostructured Ni(OH)2–ZnO mixed crystals as recyclable catalysts for the synthesis of N-unsubstituted 1,2,3-triazoles
Source: Royal Society of Chemistry journal article supplement (doi:10.1039/d2ma00824f), 2022-01-01

## Supporting Information

### **Nanostructured Ni(OH)<sub>2</sub>-ZnO mixed crystals as a recyclable catalyst for the synthesis of N-unsubstituted 1,2,3-triazoles**

Priyanuj Krishnann Hazarika, Priyanka Gogoi, Roktopol Hazarika, Kalyanjyoti Deori\* and Diganta Sarma\*

Department of Chemistry, Dibrugarh University, Dibrugarh, Assam 786004, India

#### **Table of Contents**

|                                                                                                      |                |
|------------------------------------------------------------------------------------------------------|----------------|
| <b>1. Materials and experimental procedures.....</b>                                                 | <b>S2-S3</b>   |
| <b>2. SEM image of the as-synthesized nanostructured Ni(OH)<sub>2</sub>-ZnO mixed crystals .....</b> | <b>S4</b>      |
| <b>3. Optimization tables .....</b>                                                                  | <b>S4-S6</b>   |
| <b>4. Reusability of the Catalyst.....</b>                                                           | <b>S7-8</b>    |
| <b>5. Characterization data of NH-1,2,3 triazoles derivatives.....</b>                               | <b>S9-S1</b>   |
| <b>6. <sup>1</sup>H NMR and <sup>13</sup>C NMR spectra of NH-triazole derivatives.....</b>           | <b>S13-S27</b> |

## A. Materials and experimental procedures

### 1. Chemicals

All chemicals namely Zinc acetate ( $\text{Zn}(\text{OAc})_2 \cdot 2\text{H}_2\text{O}$ , 98.5%), Nickel(II) Acetate tetrahydrate (95.0%) Polyethylene glycol-400 (PEG-400), absolute ethanol (Ethanol, 96%), Sodium Hydroxide (NaOH), Nitromethane ( $\text{CH}_3\text{NO}_2$ ), Nitroethane ( $\text{C}_2\text{H}_5\text{NO}_2$ ), Sodium Azide ( $\text{NaN}_3$ , 99%) and the aldehydes were purchased from commercial suppliers and used without further purification. The products were purified by column chromatography using silica gel (200-300 mesh). The thin-layer chromatography for visualization under UV light was performed using silica gel 60F<sub>254</sub> plates.

### 2. Instrumentation Details

<sup>1</sup>H NMR (500 MHz) and <sup>13</sup>C NMR (125 MHz) were recorded on a Bruker Avance 500 MHz spectrometer using TMS as an internal standard. The chemical shifts of the analyzed products are informed in parts per million (ppm) and splitting patterns are assigned as: s (singlet), d (doublet), t (triplet), q (quartet), m (multiplet). Thermo Scientific Endura LC/MS mass spectrometer has been used for recording mass spectra. XRD were recorded with Bruker D8 Advance X-Ray Diffractometer. Low resolution transmission electron microscopy (TEM) images, selected area electron diffraction (SAED) and phase-contrast high-resolution TEM (HRTEM) images were recorded using JEOL (JEM-F200) instrument at an accelerating voltage of 200 kV. XPS was done on ESCALAB Xi+ XPS system using an Al K $\alpha$  source. SEM and EDX analyses are carried out on Jeol JSM-IT300 Scanning electron microscope.

### 3. Preparation of catalyst

For the synthesis of Nickel-Zinc oxide mixed crystal nanoparticles, CTAB (cetyltrimethyl ammonium bromide) was used as the capping agent. 0.5 g of CTAB was initially dissolved in a solution of 50 mL of deionized water. This was then added to the zinc acetate solution prior to the addition of the nickel acetate. At first, 5.48 g (0.5 M) of zinc acetate was dissolved in 50 mL of deionized water and stirred at room temperature for 30 minutes to obtain a clear solution of zinc acetate. The individually prepared surfactant was then added to the solution of zinc acetate drop wise with continuous stirring. After complete dissolution, 25 mL of nickel acetate solution (0.11g of nickel acetate in 25 mL water) was added to zinc acetate-surfactant solution drop wise and the resultant solution was heated in a magnetic stirrer at 80°C until a homogenous solution was obtained. Then, 0.5 M solution of NaOH was added to the above mixture until precipitation occurs and allowed to agitate at room temperature for 3 hour. The as-obtained

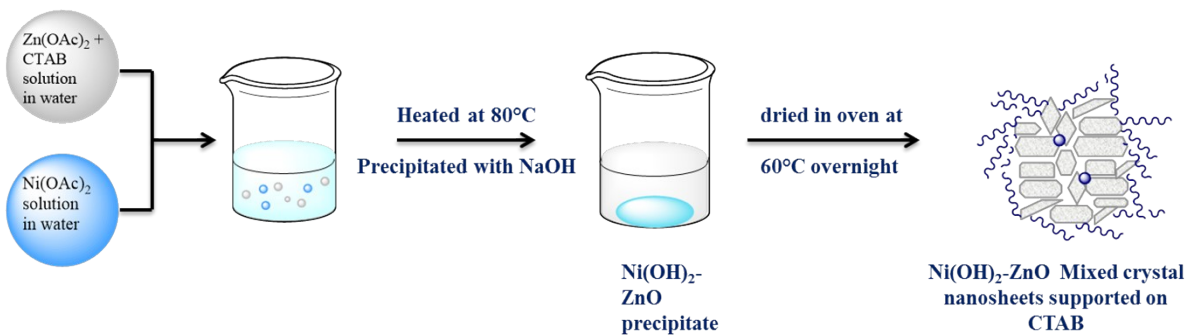

Figure S1 : Schematic representation for the formation of  $\text{Ni(OH)}_2\text{-ZnO}$  nanostructured mixed crystals

light blue product was then centrifuged and washed with water and ethanol for several times to remove excess surfactants or any other impurities. The final product was then air dried at  $80^\circ\text{C}$  for 7 h and further characterized by Scanning Electron Microscopy (SEM), Transmission Electron Microscopy (TEM), XPS and X-Ray Diffraction (XRD) analyses.

ZnO nanoparticles supported on CTAB has been synthesized following the same procedure as above and only the steps involving the addition of nickel acetate was omitted during the reaction.

#### 4. Synthesis of NH-triazoles

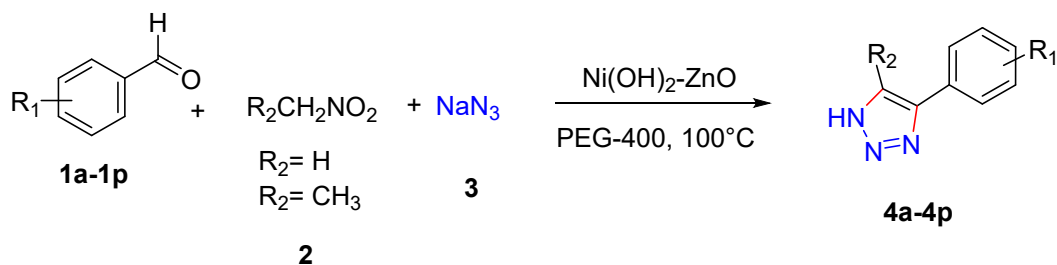

The corresponding aromatic aldehyde (1mmol), nitroalkane (2 mmol), sodium azide (3 mmol), and  $\text{Ni(OH)}_2\text{-ZnO}$  nanocatalyst (0.025 g) were stirred in a round-bottom flask containing 5 mL of PEG-400 solvent at  $100^\circ\text{C}$ . The progress of the reactions was checked by TLC. After completion of the reaction, the mixture was cooled to room temperature and extracted with ethyl acetate ( $4 \times 10$  mL). The filtrate was evaporated to dryness under reduced pressure. The final product was purified by column chromatography over silica gel using hexane/ethyl acetate mixture and the products obtained were characterized by NMR and mass spectroscopy. The recovered catalyst was washed with hot ethanol, dried and reused.

**B. Characterization of Nanostructured  $\text{Ni}(\text{OH})_2\text{-ZnO}$  mixed crystals**

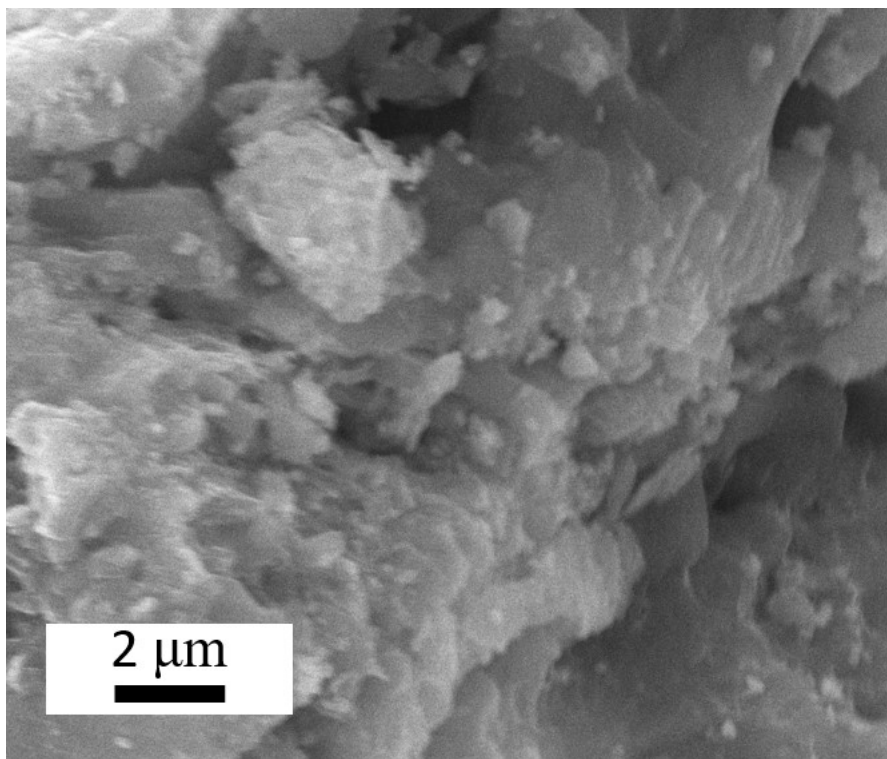

Figure S2: SEM image of the as-synthesized nanostructured  $\text{Ni}(\text{OH})_2\text{-ZnO}$  mixed crystals

### C. Optimization tables

Table S1: Optimization of catalyst loading in the synthesis of 4-aryl-NH-1,2,3-triazoles<sup>a</sup>

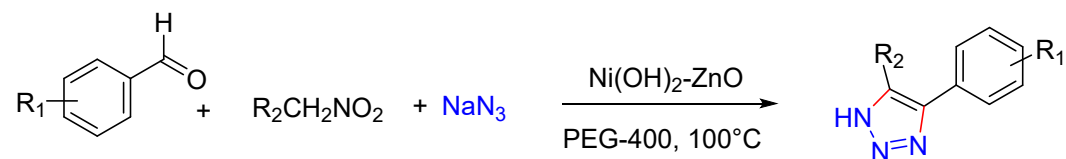

| Sl. No. | Catalyst (mg) | Time (h) | Yield (%) <sup>b</sup> |
|---------|---------------|----------|------------------------|
| 1       | 30            | 4        | 96                     |
| 2       | 25            | 4        | 96                     |
| 3       | 20            | 4        | 90                     |
| 4       | 15            | 4        | 85                     |
| 5       | 10            | 4        | 83                     |
| 6       | 5             | 4        | 80                     |
| 7       | 25            | 3.5      | 96                     |
| 8       | 25            | 2        | 90                     |

<sup>a</sup>Reaction conditions: 4-chloro benzaldehyde (0.140g, 1 mmol), sodium azide (0.195g, 3 mmol) and nitromethane (0.122g, 2 mmol) were refluxed in PEG-400 (4 ml) with different amount of catalysts.

<sup>b</sup>Isolated yield

Table S2: Solvent and temperature optimization<sup>a</sup>.

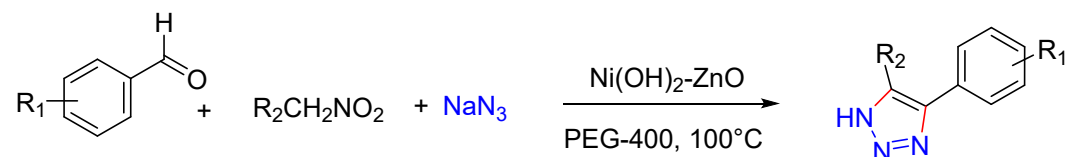

| Sl. No. | Solvent         | Temperature | Yield (%) <sup>b</sup> |
|---------|-----------------|-------------|------------------------|
| 1       | Ethylene Glycol | 100         | 50                     |
| 2       | Water           | 100         | trace                  |
| 3       | Ethanol         | 80          | 30                     |
| 4       | Toluene         | 100         | 50                     |
| 5       | Acetonitrile    | 80          | 20                     |
| 6       | DMF             | 100         | 60                     |

|    |                               |      |       |
|----|-------------------------------|------|-------|
| 7  | DMSO                          | 100  | 65    |
| 8  | PEG-400                       | 100  | 96    |
| 9  | PEG-400                       | 80   | 85    |
| 10 | PEG-400                       | 60   | 80    |
| 12 | PEG-400                       | r.t. | trace |
| 13 | Chloroform                    | 60   | -     |
| 14 | THF                           | 65   | -     |
| 15 | H <sub>2</sub> O + PEG ( 1:1) | 100  | 80    |
| 16 | H <sub>2</sub> O + PEG ( 1:3) | 100  | 80    |

<sup>a</sup>Reaction conditions: 4-chloro benzaldehyde (0.140 g, 1 mmol), sodium azide (0.195 g, 3 mmol) and nitromethane (0.122 g, 2 mmol) were reacted in PEG-400 (4 ml) for 4 h with different solvents.

<sup>b</sup>Isolated yield.

Table 3: Optimization of the catalyst<sup>a</sup>

| Sl. No. | catalyst             | Amount (mg) | Yield (%) <sup>b</sup> |
|---------|----------------------|-------------|------------------------|
| 1       | Zn(OAc) <sub>2</sub> | 25          | 45                     |
| 2       | Ni(OAc) <sub>2</sub> | 25          | 50                     |
| 3       | ZnO nanoparticles    | 25          | 80                     |
| 4       | 1% Ni@ ZnO           | 25          | 94                     |
| 5       | 2% Ni@ZnO            | 25          | 96                     |
| 6       | 5% Ni@ZnO            | 25          | 90                     |
| 7       | Without catalyst     | -           | 45                     |

<sup>a</sup>Reaction conditions: 4-chloro benzaldehyde (0.140 g, 1 mmol), sodium azide (0.195 g, 3 mmol) and nitromethane (0.122 g, 2 mmol) were reacted in PEG-400 (4 ml) for 4 h with different catalysts.

<sup>b</sup>Isolated yield.

Table S4: Gram Scale Synthesis<sup>a</sup>

| Sl.No. | Aldehyde | Nitroalkane | Sodium Azide | %Yield <sup>b</sup> |
|--------|----------|-------------|--------------|---------------------|
|--------|----------|-------------|--------------|---------------------|

|   |                                          |                                       |                                     |    |
|---|------------------------------------------|---------------------------------------|-------------------------------------|----|
| 1 | 4-fluorobenzaldehyde<br>( 1g, 8.05 mmol) | Nitromethane<br>( 0.983g, 16.12 mmol) | Sodium Azide<br>( 1.6g, 24.15 mmol) | 70 |
| 2 | 4-bromobenzaldehyde<br>( 1g, 5.40 mmol)  | Nitromethane<br>( 0.659g, 10.8 mmol)  | Sodium Azide<br>( 1.05g, 16.2 mmol) | 68 |

<sup>a</sup>Reaction conditions: aldehyde (1 mmol), sodium azide (3mmol) and nitromethane (2 mmol) were reacted in PEG-400 (4 ml) with Ni(OH)<sub>2</sub>-ZnO catalysts.

<sup>b</sup>Isolated yield.

### C. Recyclability of catalyst<sup>a</sup>

We have performed the recyclability test by taking the exact molar ratios of substrates with respect to the amount of the recovered catalyst and found no significant drop of the catalytic activity.

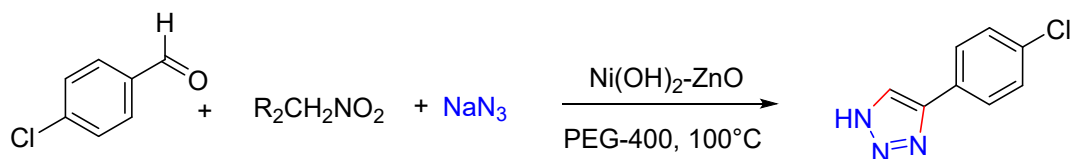

| Sl.No.              | 4-chloro benzaldehyde | Nitromethane       | Sodium azide       | Catalyst ( mg ) | Yield (%) <sup>b</sup> |
|---------------------|-----------------------|--------------------|--------------------|-----------------|------------------------|
| 1 <sup>st</sup> Run | 0.140 g, 1 mmol       | 0.122g, 2 mmol     | 0.195g, 3 mmol     | 25*             | 96                     |
| 2 <sup>nd</sup> Run | 0.123 g, 0.88 mmol    | 0.107 g, 1.76 mmol | 0.171 g, 2.64 mmol | 22 **           | 95                     |
| 3 <sup>rd</sup> Run | 0.117 g, 0.84 mmol    | 0.102 g, 1.68 mmol | 0.163 g, 2.52 mmol | 21 **           | 92                     |
| 4 <sup>th</sup> Run | 0.112 g, 0.80 mmol    | 0.070 g, 1.60 mmol | 0.156 g, 2.40 mmol | 20**            | 90                     |

\* Initial catalyst amount

\*\* Recovered catalyst amount after each successive runs

<sup>a</sup>Reaction conditions: aldehyde (1 mmol), sodium azide (3mmol) and nitromethane (2 mmol) were reacted in PEG- 400 (4 ml) with Ni(OH)<sub>2</sub>–ZnO catalysts. <sup>b</sup>Isolated yield.

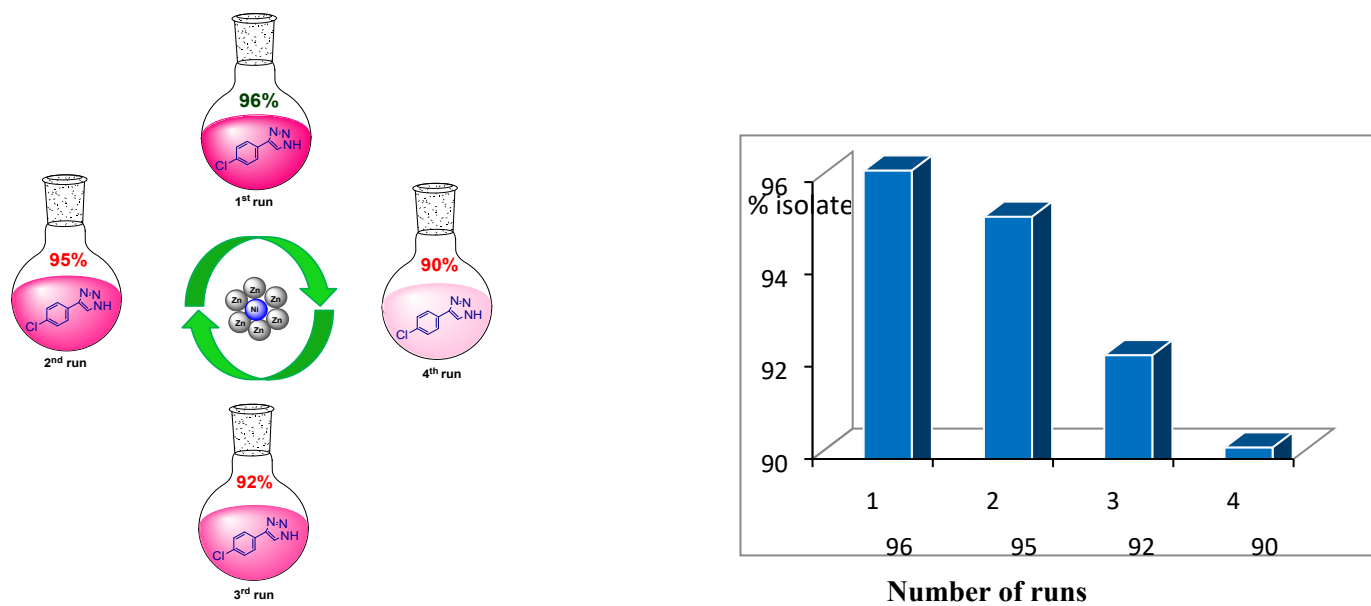

Figure S3: Schematic and graphical representation of the reused catalyst

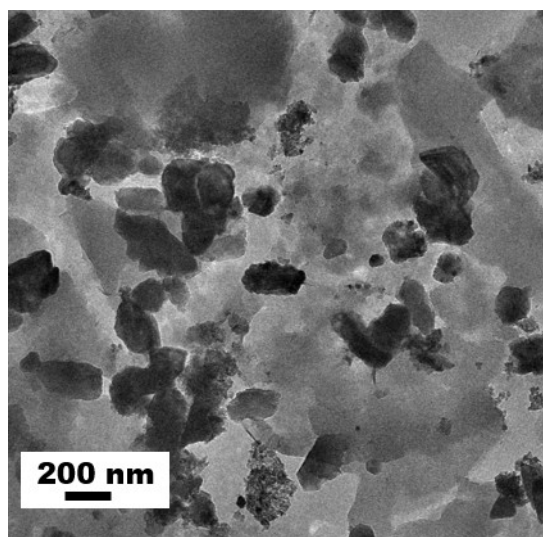

Figure S4: TEM image of the recovered catalyst



#### D. Characterization data of NH-1,2,3 triazoles derivatives

##### 4-(2-nitrophenyl)-1H-1,2,3-triazole ( Scheme 1 , Entry 4c)

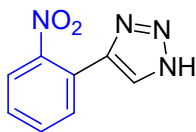

Brown solid; MS (EI) m/z: 191.16 [M+H]<sup>+</sup>

<sup>1</sup>H NMR (500 MHz, CDCl<sub>3</sub>) δ: 12.51(s, 1H), 7.68 (s, 1H), 7.56-7.57(d, 1H), 7.82-7.91 (m, 3H);

<sup>13</sup>C NMR (126 MHz, CDCl<sub>3</sub>) δ: 148.73, 132.52, 131.26, 129.51, 124.20.

##### 4-(2,4-dichlorophenyl)-1H-1,2,3-triazole ( Scheme 1 , Entry 4j)

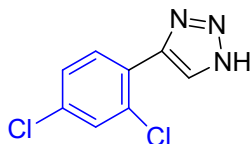

Pale yellow solid; MS (EI) m/z: 213.97 [M+H]<sup>+</sup>

<sup>1</sup>H NMR (500 MHz, CDCl<sub>3</sub>) δ: 10.33 (s, 1H), 8.27 (s, 1H), 7.9-7.95 (d, 1H), 7.53 (s, 1H), 7.27-7.38 (d, 1H),

<sup>13</sup>C NMR (126 MHz, CDCl<sub>3</sub>) δ: 131.12, 130.91, 130.21, 129.65, 129.26, 127.64.

##### 4-(2-chloro-6-fluorophenyl)-1H-1,2,3-triazole ( Scheme 1 , Entry 4e)

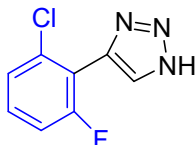

Dark brown solid; MS (EI) m/z: 198.04 [M+H]<sup>+</sup>

<sup>1</sup>H NMR (500 MHz, CDCl<sub>3</sub>) δ: 9.16 (s, 1H), 8.05(s, 1H), 7.33-7.31(t, 1H), 7.10-7.11 (d, 1H), 7.12-7.14 (d, 1H),

<sup>13</sup>C NMR (126 MHz, CDCl<sub>3</sub>) δ: 161.74, 137.25, 134.60, 130.50, 126.03, 118.00, 117.87, 114.72.

##### 4-(4-fluorophenyl)-1H-1,2,3-triazole ( Scheme 1 , Entry 4b)

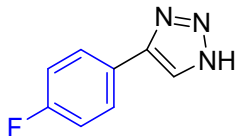

Brick red solid; MS (EI) m/z: 164.08 [M+H]<sup>+</sup>

<sup>1</sup>H NMR (500 MHz, CDCl<sub>3</sub>) δ: 8.43 (s, 1H), 7.93 (s, 1H), 7.80-7.82 (d, 2H), 7.15-7.20(d, 2H),

<sup>13</sup>C NMR (126 MHz, CDCl<sub>3</sub>) δ: 175.29, 127.91, 127.85, 116.06, 115.89.

##### 4-(p-tolyl)-1H-1,2,3-triazole ( Scheme 1 , Entry 4h)

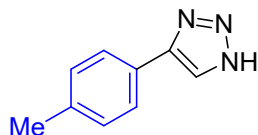

Red Solid, MS (EI) m/z: 160.10 [M+H]<sup>+</sup>

<sup>1</sup>H NMR (500 MHz, CDCl<sub>3</sub>) δ: 8.43 (s, 1H), 7.94 (s, 1H), 7.72-7.74 (d, 2H), 7.23-7.27 (d, 2H), 2.36 (s, 3H)

<sup>13</sup>C NMR (126 MHz, CDCl<sub>3</sub>) δ: 138.69, 129.69, 128.62, 128.42, 126.88, 126.07, 21.34.

4-phenyl-1H-1,2,3-triazole ( Scheme 1 , Entry 4f)

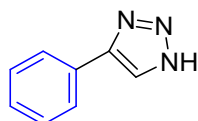

Pale yellow solid; MS (EI) m/z: 146.35 [M+H]<sup>+</sup>

<sup>1</sup>H NMR (500 MHz, CDCl<sub>3</sub>) δ 8.46 (s, 1H), 8.00 (s, 1H), 7.31-7.85 (m, 5H),

<sup>13</sup>C NMR (126 MHz, CDCl<sub>3</sub>) δ: 155.57, 129.77, 129.01, 128.78, 126.17.

4-(2-chlorophenyl)-1H-1,2,3-triazole ( Scheme 1 , Entry 4d)

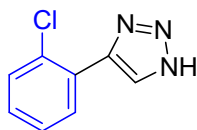

Yellow solid; MS (EI) m/z: 180.15 [M+H]<sup>+</sup>

<sup>1</sup>H NMR (500 MHz, CDCl<sub>3</sub>) δ: 8.10 (s, 1H), 8.03 (s, 1H), 7.95-7.97 (d, 1H), 7.63-7.74 (m, 3H),

<sup>13</sup>C NMR (126 MHz, CDCl<sub>3</sub>) δ: 175.83, 175.30, 134.78, 132.77, 132.26, 128.82, 127.01, 126.47, 118.68.

4-(4-chlorophenyl)-1H-1,2,3-triazole ( Scheme 1 , Entry 4a)

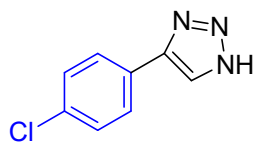

Red solid; MS (EI) m/z: 180.05 [M+H]<sup>+</sup>

<sup>1</sup>H NMR (500 MHz, CDCl<sub>3</sub>) δ: 8.46 (s, 1H), 7.95 (s, 1H), 7.14-7.45 (m, 4H)

<sup>13</sup>C NMR (126 MHz, CDCl<sub>3</sub>) δ: 155.86, 130.00, 129.81, 129.20, 129.03, 128.99, 128.50, 127.37.

4-(furan-2-yl)-1H-1,2,3-triazole ( Scheme 1 , Entry 4i)

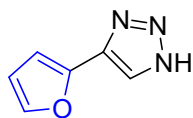

Brown solid; MS (EI) m/z: 136.06 [M+H]<sup>+</sup>

<sup>1</sup>H NMR (500 MHz, CDCl<sub>3</sub>) δ: 8.66 (s, 1H), 7.92 (s, 1H), 7.38-7.51 (m, 2H), 6.81-6.83 (d, 1H)

<sup>13</sup>C NMR (126 MHz, CDCl<sub>3</sub>) δ: 155.10, 142.99, 139.27, 111.58, 108.04.

4-(4-bromophenyl)-1H-1,2,3-triazole ( Scheme 1 , Entry 4m)

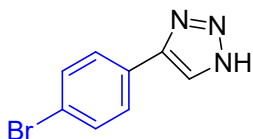

Light yellow; MS (EI) m/z: 223.96 [M+H]<sup>+</sup>

<sup>1</sup>H NMR (500 MHz, CDCl<sub>3</sub>) δ: 8.46 (s, 1H), 7.95 (s, 1H), 7.70-7.71 (d, 2H), 7.55-7.59 (d, 2H)

<sup>13</sup>C NMR (126 MHz, CDCl<sub>3</sub>) δ: 175.80, 175.27, 132.08, 129.19, 128.82, 127.58.

4-(4-bromophenyl)-5-methyl-1H-1,2,3-triazole ( Scheme 1 , Entry 4n)

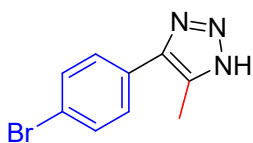

Dark yellow; MS (EI) m/z: 237.99 [M+H]<sup>+</sup>

<sup>1</sup>H NMR (500 MHz, CDCl<sub>3</sub>) δ: 7.48-7.50 (d, 2H), 7.53-7.55 (d, 2H), 2.93(s, 1H);

<sup>13</sup>C NMR (126 MHz, CDCl<sub>3</sub>) δ: 173.46, 131.96, 131.75, 129.97, 128.79, 128.52, 121.61, 14.07.

4-(4-fluorophenyl)-5-methyl-1H-1,2,3-triazole ( Scheme 1 , Entry 4l)

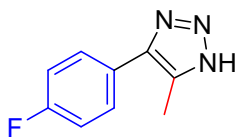

Dark red; MS (EI) m/z: 178.07 [M+H]<sup>+</sup>

<sup>1</sup>H NMR (500 MHz, CDCl<sub>3</sub>) δ: 9.78 (s, 1H), 7.70-7.72 (d, 2H), 7.18-7.21 (d, 2H), 2.51 (s, 3H)

<sup>13</sup>C NMR (126 MHz, CDCl<sub>3</sub>) δ: 129.06, 129.00, 128.82, 115.89, 115.72, 14.13.

4-(anthracen-9-yl)-1H-1,2,3-triazole ( Scheme 1 , Entry 4p)

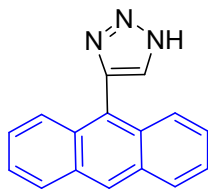

Yellow; MS (EI) m/z: 246.11 [M+H]<sup>+</sup>

<sup>1</sup>H NMR (500 MHz, CDCl<sub>3</sub>) δ: 9.78(s,1H),, 8.58(s,1H), 8.37-8.38(d,1H), , 8.08-8.06(d,1H), 7.98- 7.94(d,1H), 7.50-7.42(m,5H);

<sup>13</sup>C NMR (126 MHz, CDCl<sub>3</sub>) δ: 131.21, 128.78, 128.60, 126.46, 126.28, 125.89, 125.76, 125.55, 125.38, 125.28.

4-(thiophen-2-yl)-1H-1,2,3-triazole ( Scheme 1 , Entry 4k)

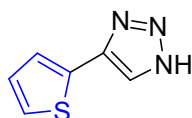

Dark brown solid; MS (EI) m/z: 152.05 [M+H]<sup>+</sup>

<sup>1</sup>H NMR (500 MHz, CDCl<sub>3</sub>) δ: 8.53 (s, 1H), 7.91 (s, 1H), 7.45-7.44 (d, 1H), 7.36-7.35 (d, 1H), 7.12- 7.10 (t, 1H);

<sup>13</sup>C NMR (126 MHz, CDCl<sub>3</sub>) δ: 155.90, 142.20, 131.98, 131.01, 128.59, 127.83, 127.75, 126.53, 125.88, 125.38, 77.34, 77.08, 76.83.

4-(4-isocyanophenyl)-1H-1,2,3-triazole ( Scheme 1 , Entry 4o)

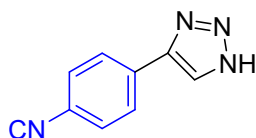

Dark brown solid; MS (EI) m/z: 171.07 [M+H]<sup>+</sup>

<sup>1</sup>H NMR (500 MHz, CDCl<sub>3</sub>) δ: 9.78 (s, 1H), 8.05 (s, 1H), 7.98-7.96 (d, 1H), 7.77- 7.76 (d, 1H), 7.68-7.67 (d, 1H),, 7.51-7.49 (d, 1H);

<sup>13</sup>C NMR (126 MHz, CDCl<sub>3</sub>) δ: 146.18, 134.53, 132.83, 132.36, 127.05, 126.55, 118.86, 118.64, 112.10, 111.26, 76.78.

### E. $^1\text{H}$ NMR and $^{13}\text{C}$ NMR spectra of NH-triazoles derivatives

$^1\text{H}$  NMR and  $^{13}\text{C}$  NMR spectra of 4-(4-isocyanophenyl)-1H-1,2,3-triazole ( Scheme 1 , Entry 4o) respectively.

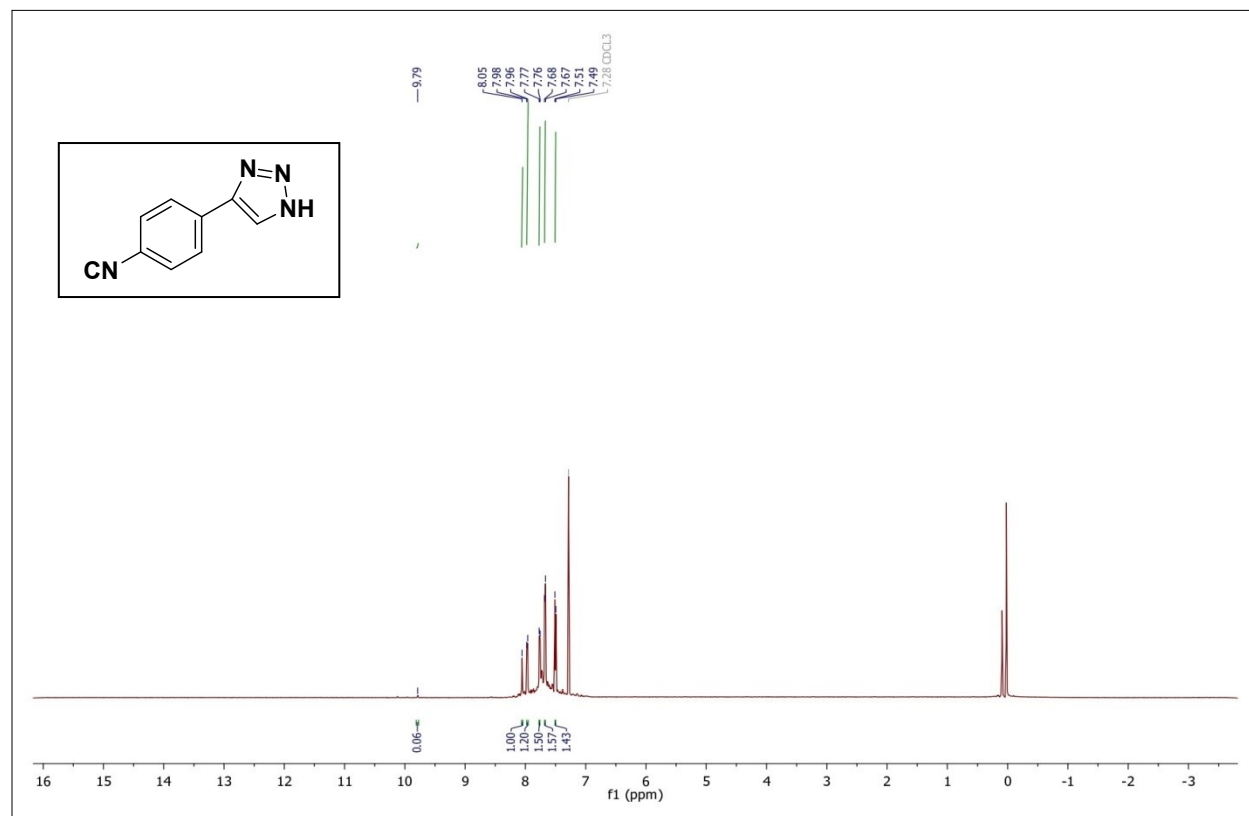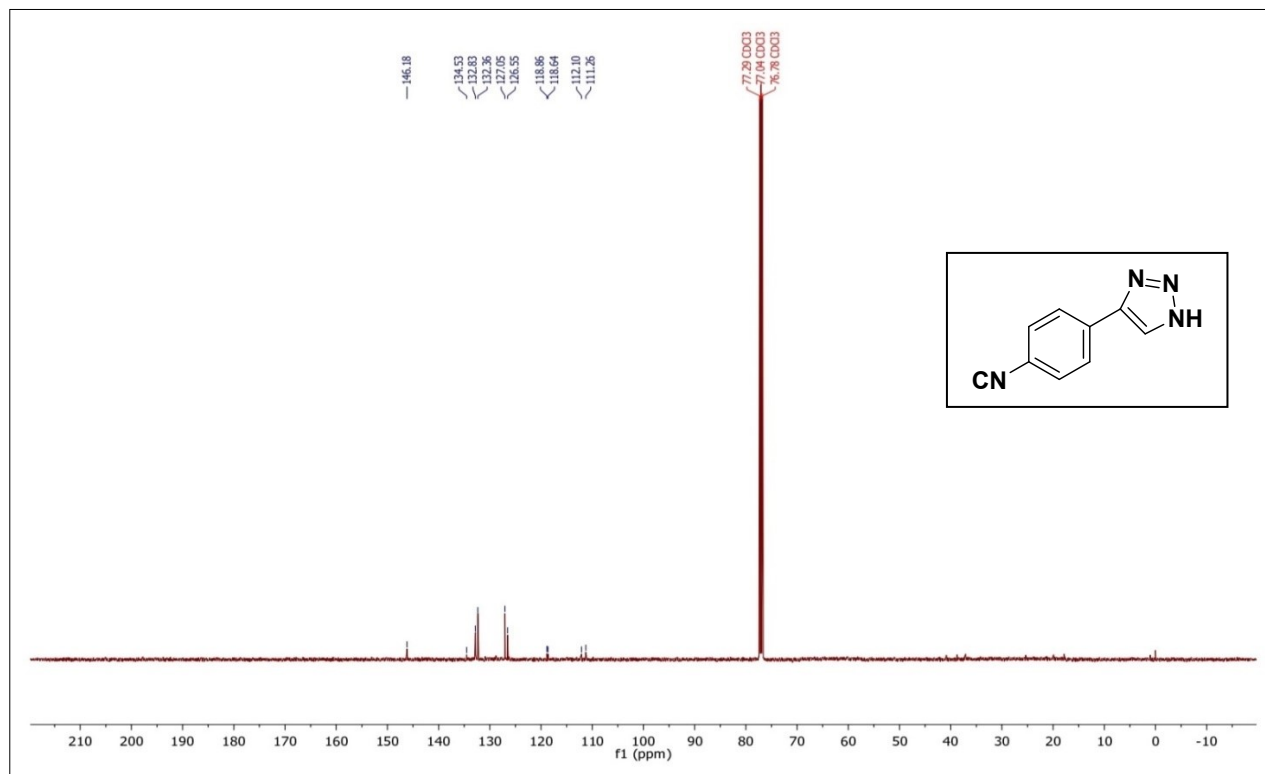

$^1\text{H}$  NMR and  $^{13}\text{C}$  NMR spectra of 4-(4-fluorophenyl)-5-methyl-1H-1,2,3-triazole ( Scheme 1 , Entry 4I) respectively

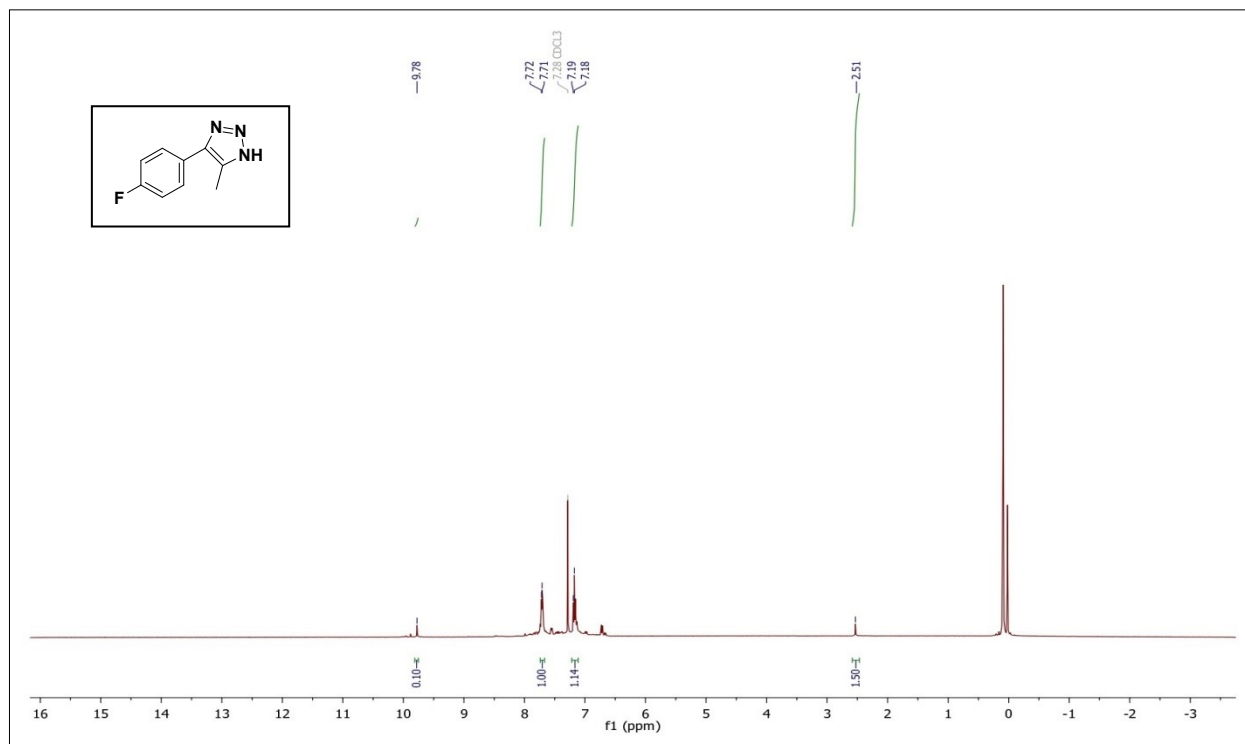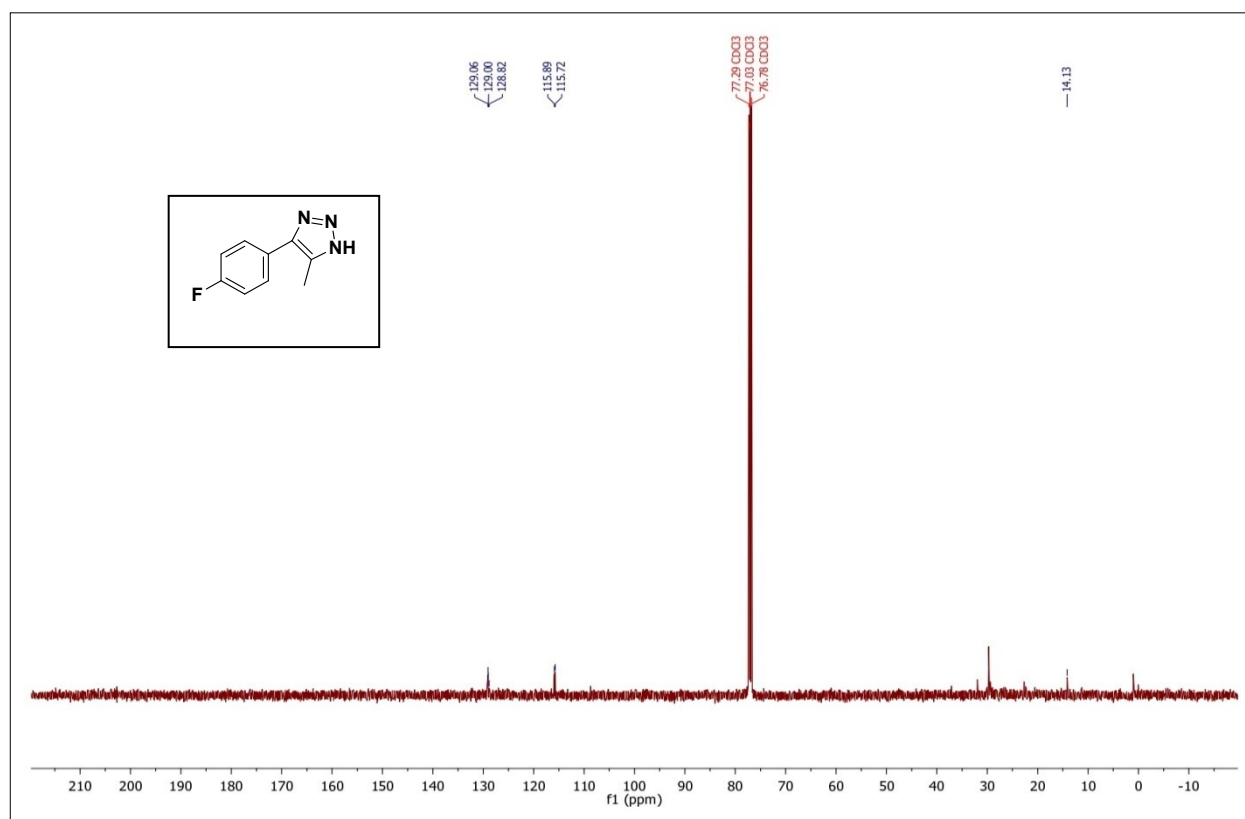

$^1\text{H}$  NMR and  $^{13}\text{C}$  NMR spectra of 4-(anthracen-9-yl)-1H-1,2,3-triazole (Scheme 1, Entry 4p) respectively

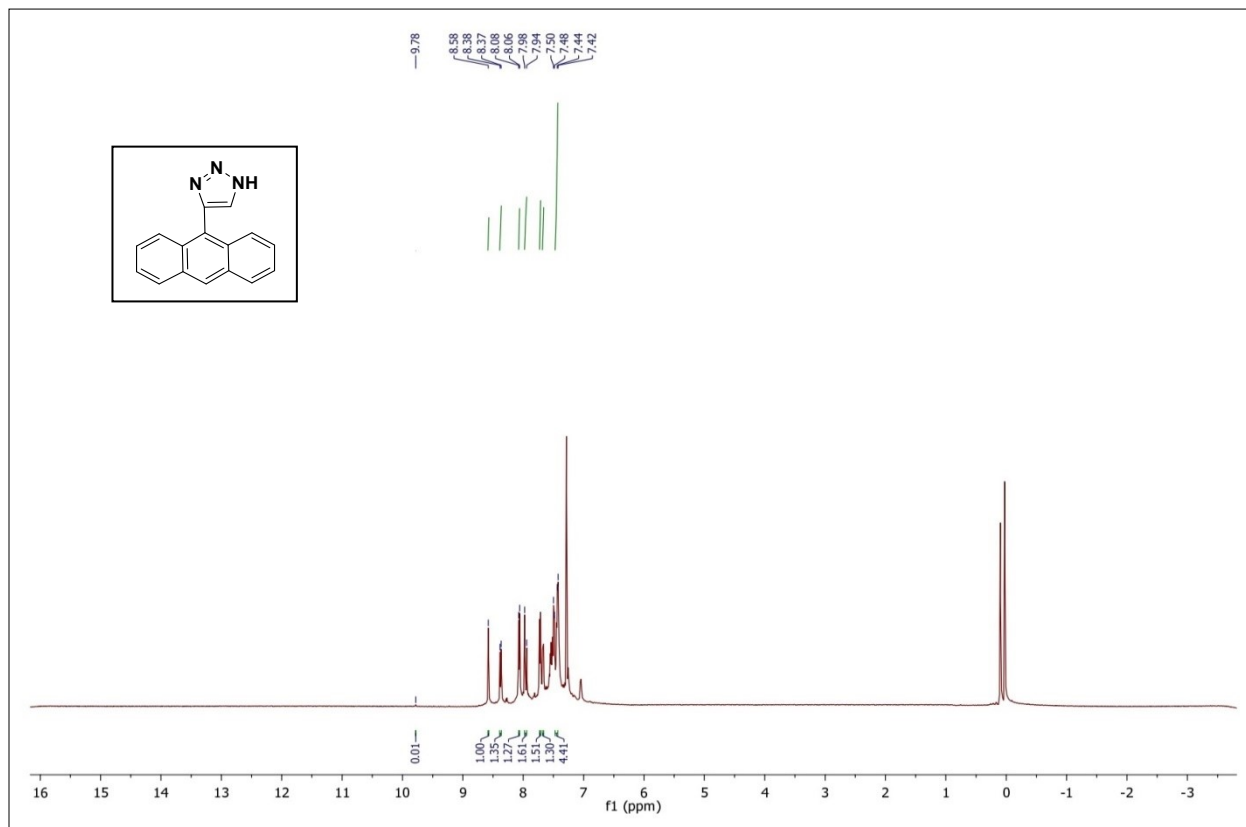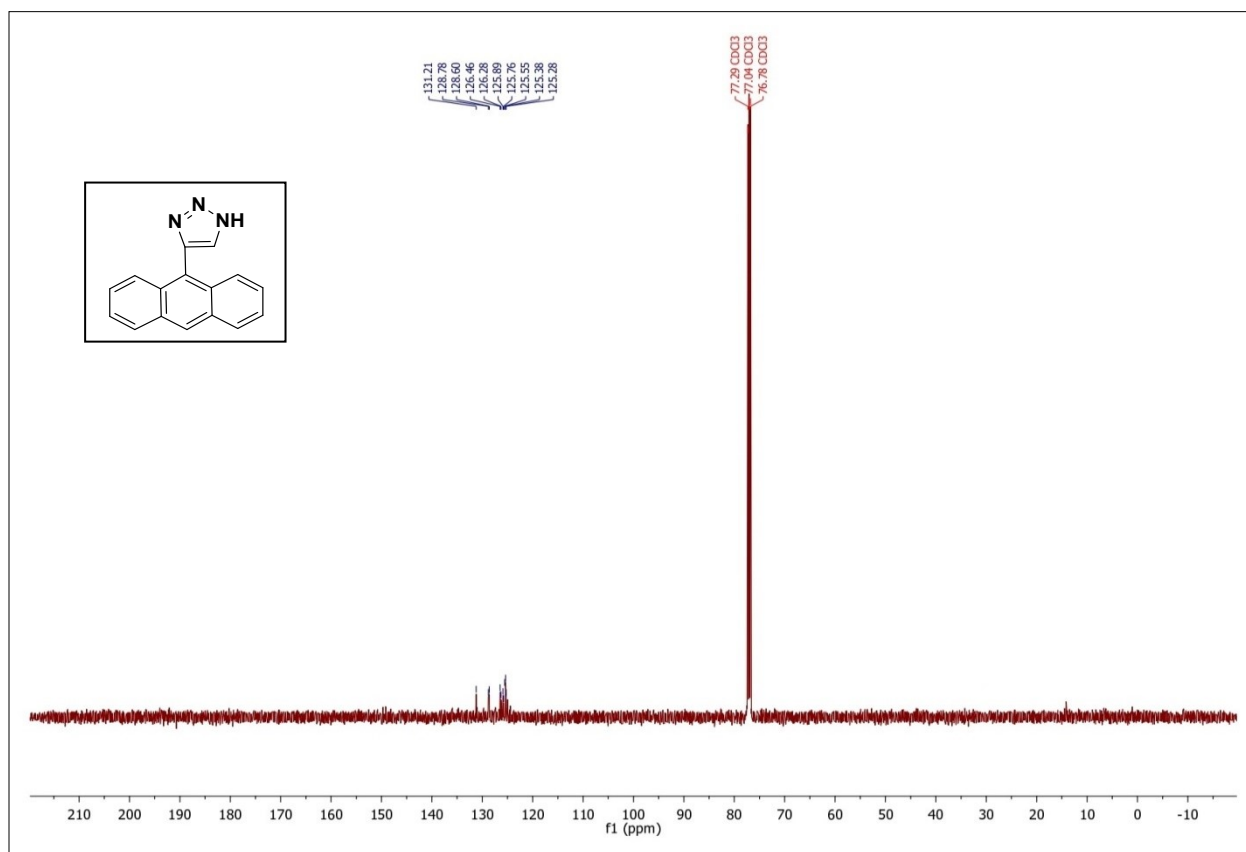

$^1\text{H}$  NMR and  $^{13}\text{C}$  NMR spectra of 4-(4-bromophenyl)-1H-1,2,3-triazole ( Scheme 1 , Entry 4m) respectively

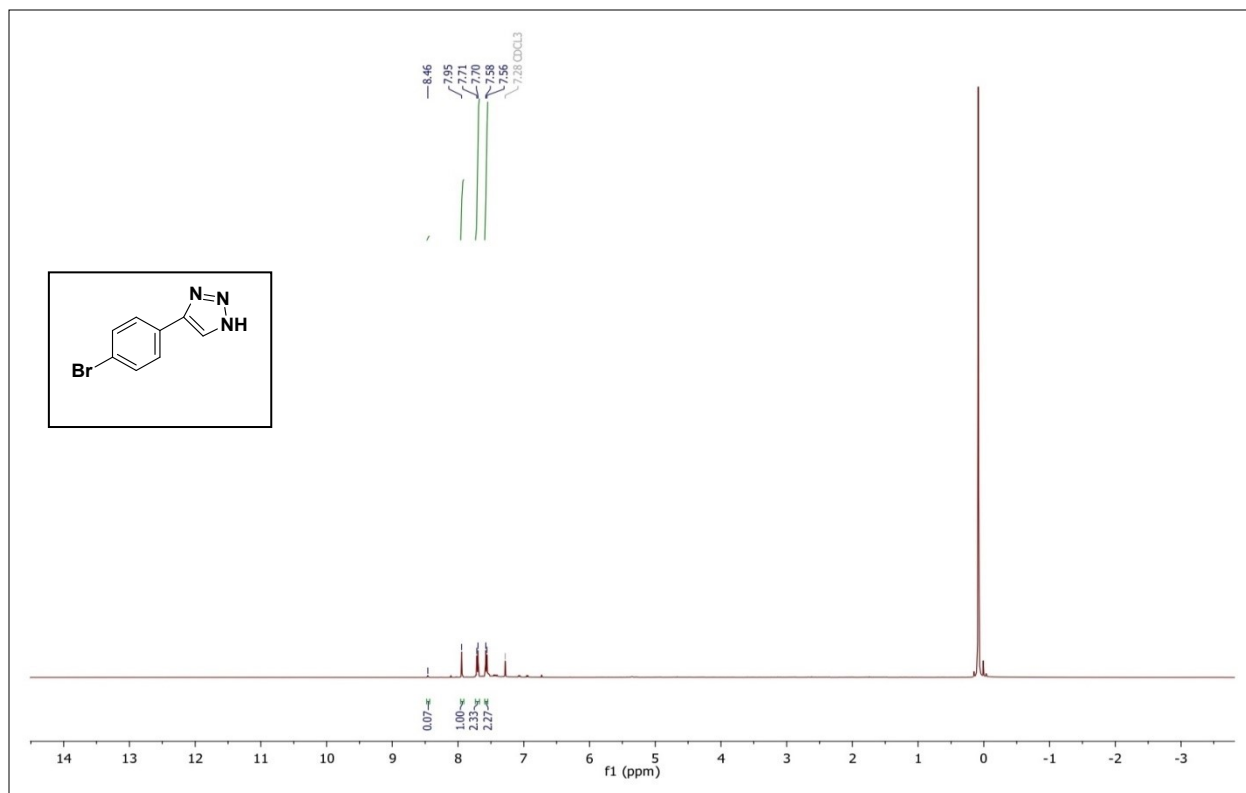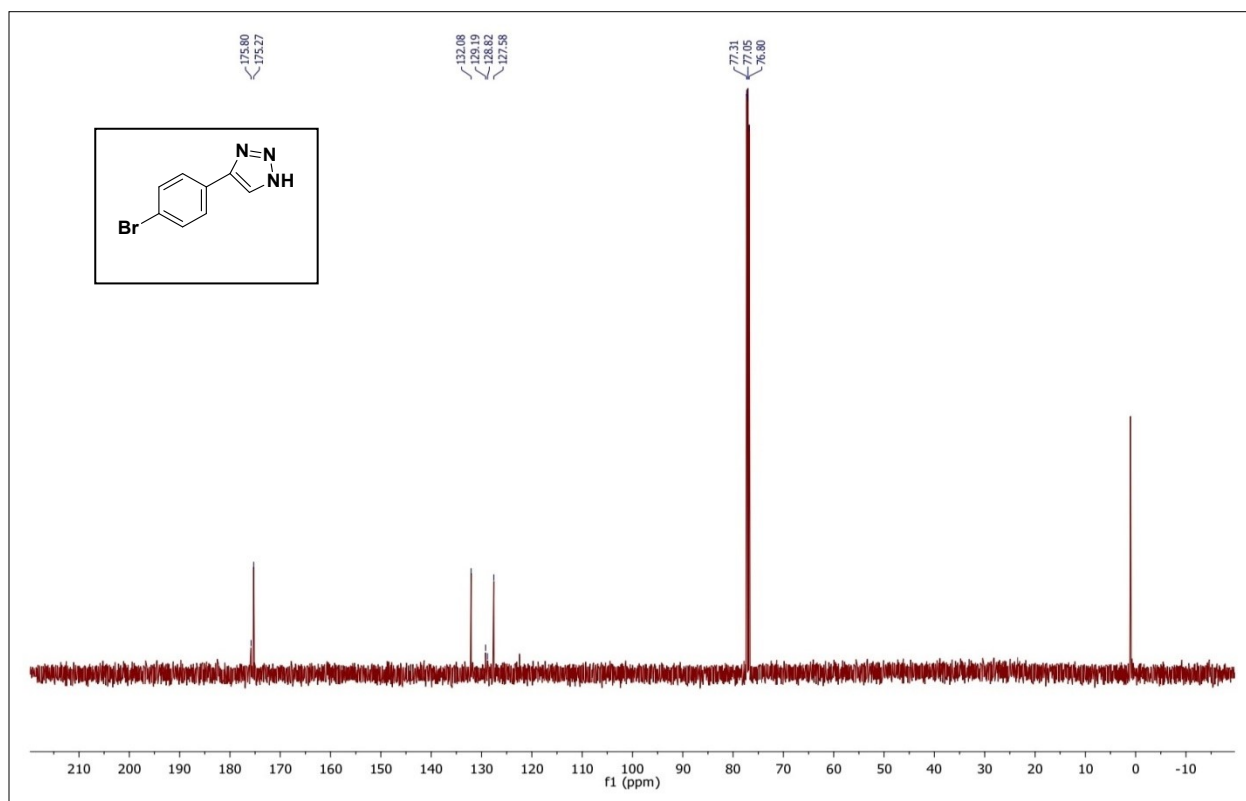



$^1\text{H}$  NMR and  $^{13}\text{C}$  NMR spectra of 4-(4-bromophenyl)-5-methyl-1H-1,2,3-triazole ( **Scheme 1** , **Entry 4n**) respectively

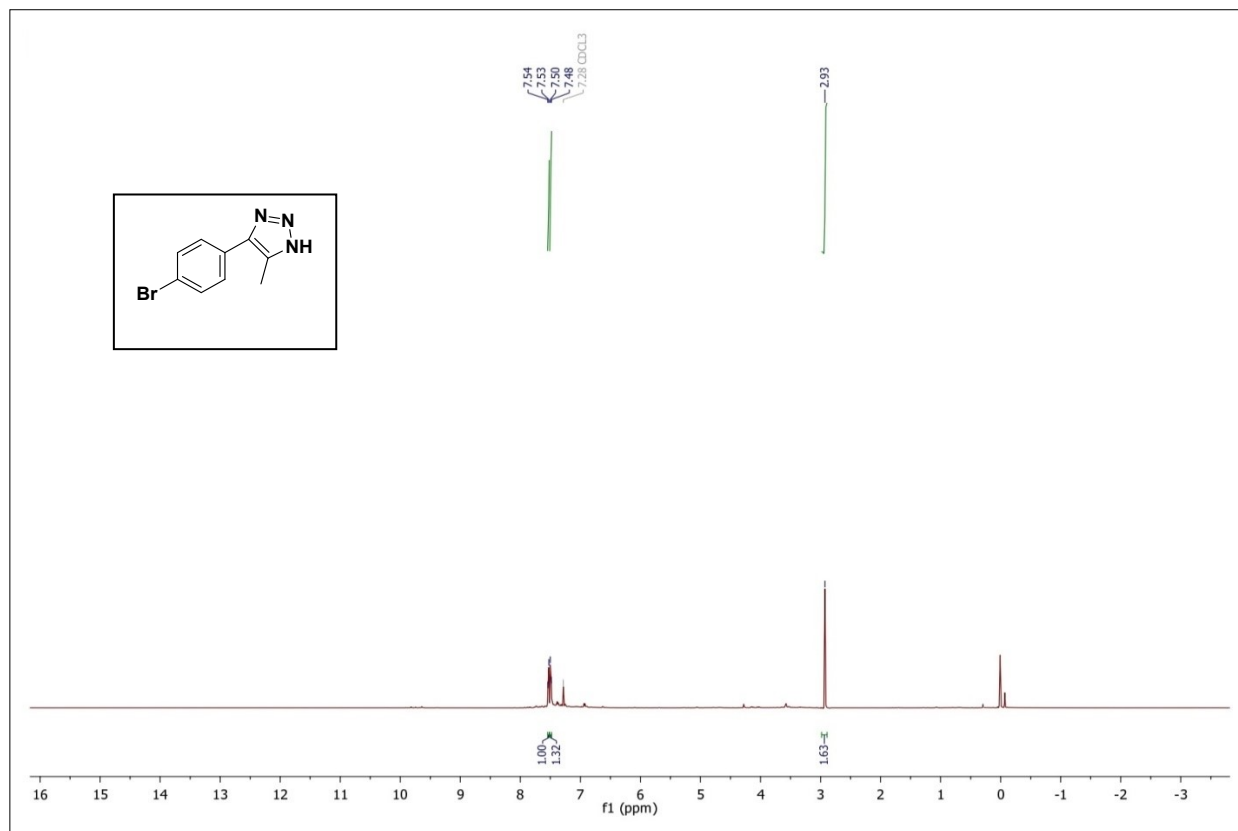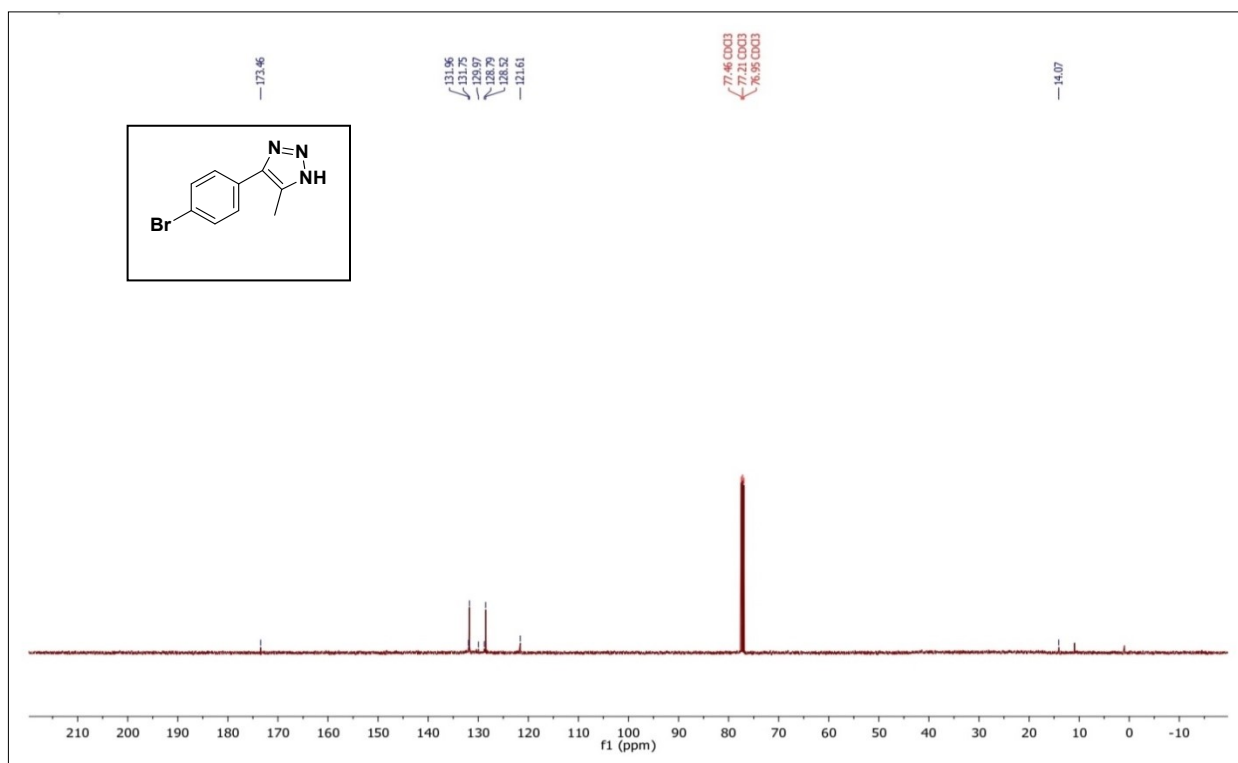

$^1\text{H}$  NMR and  $^{13}\text{C}$  NMR spectra of 4-(thiophen-2-yl)-1H-1,2,3-triazole ( **Scheme 1** , Entry 4k) respectively

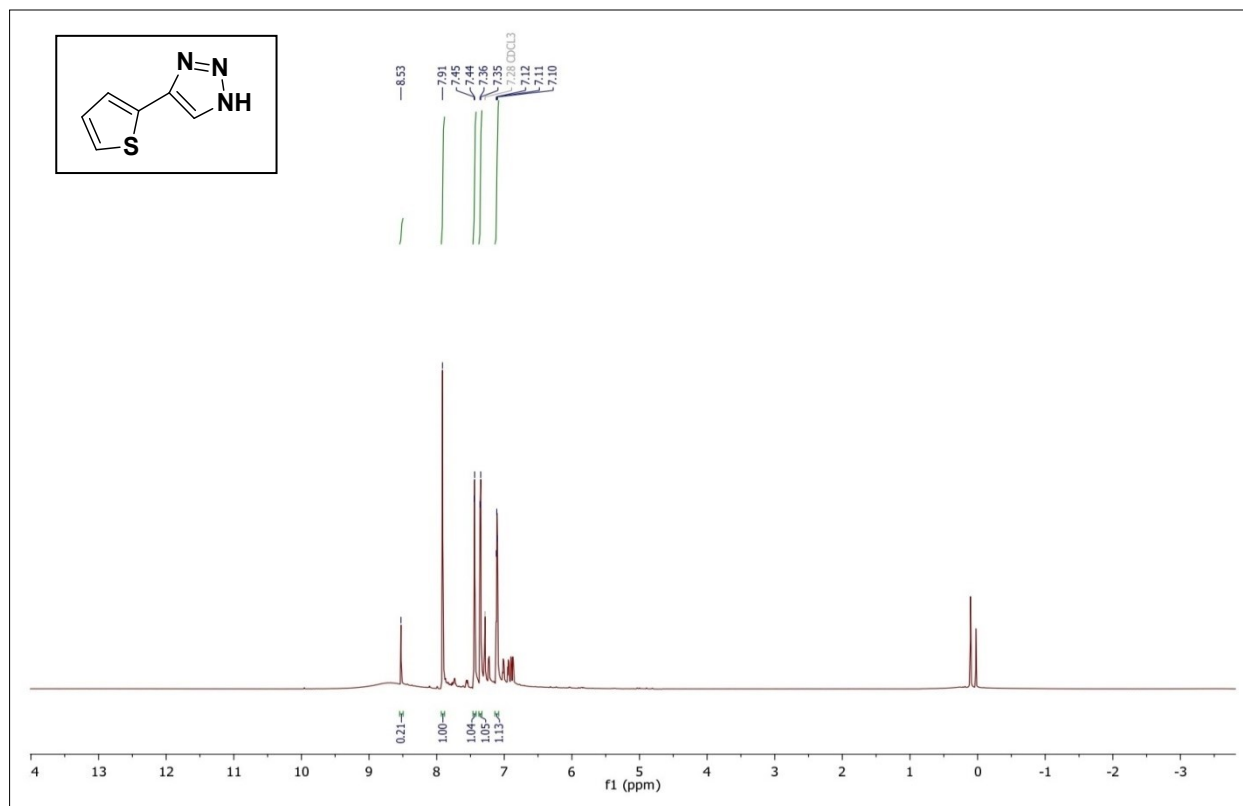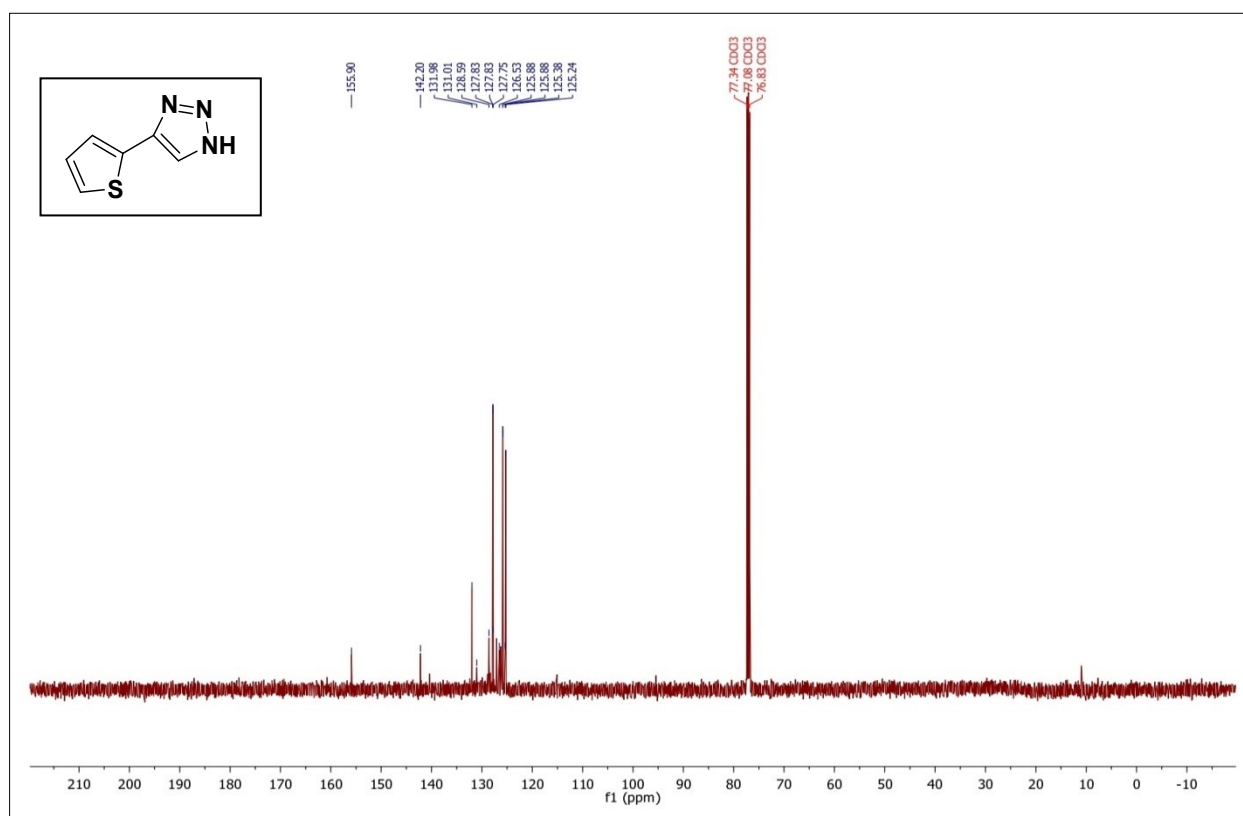

$^1\text{H}$  NMR and  $^{13}\text{C}$  NMR spectra of 4-(2-nitrophenyl)-1H-1,2,3-triazole ( **Scheme 1** , Entry 4c) respectively

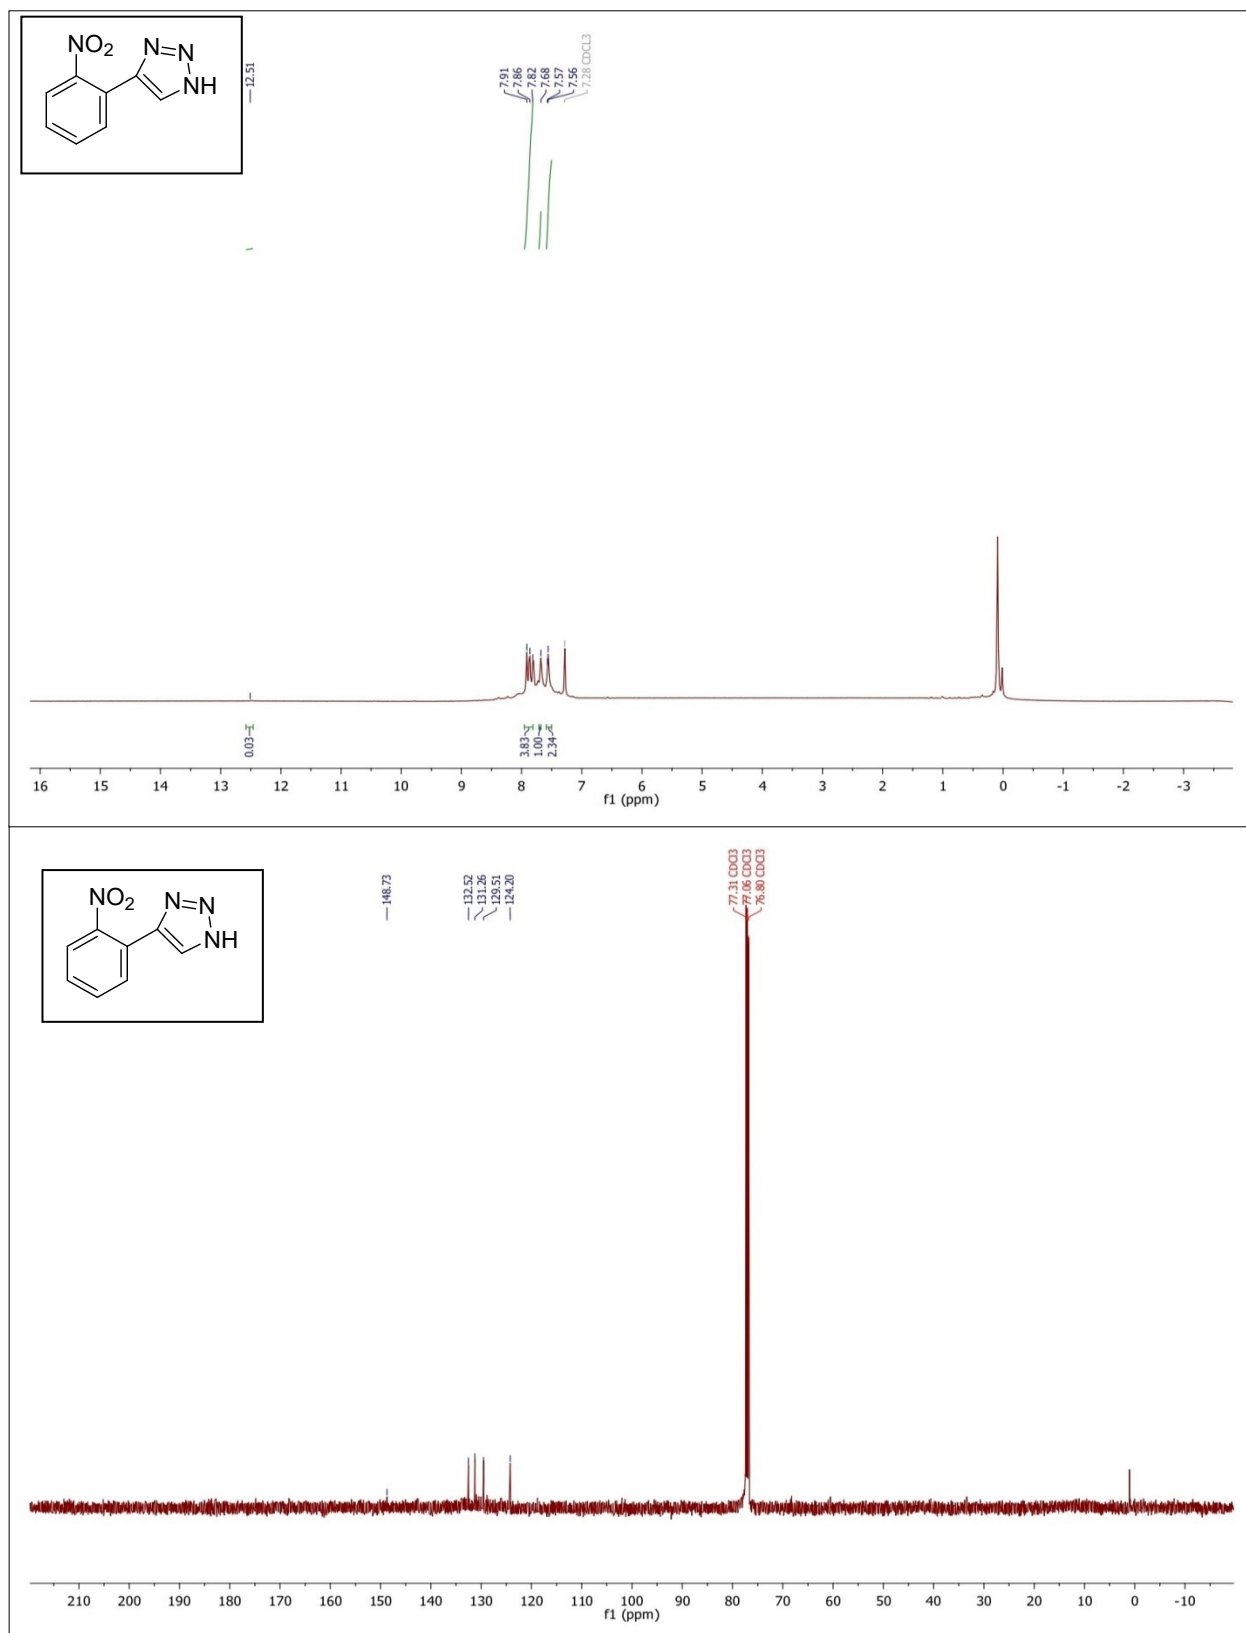

$^1\text{H}$  NMR and  $^{13}\text{C}$  NMR spectra of 4-(2, 4-dichlorophenyl)-1H-1,2,3-triazole ( **Scheme 1** , **Entry 4j**) respectively

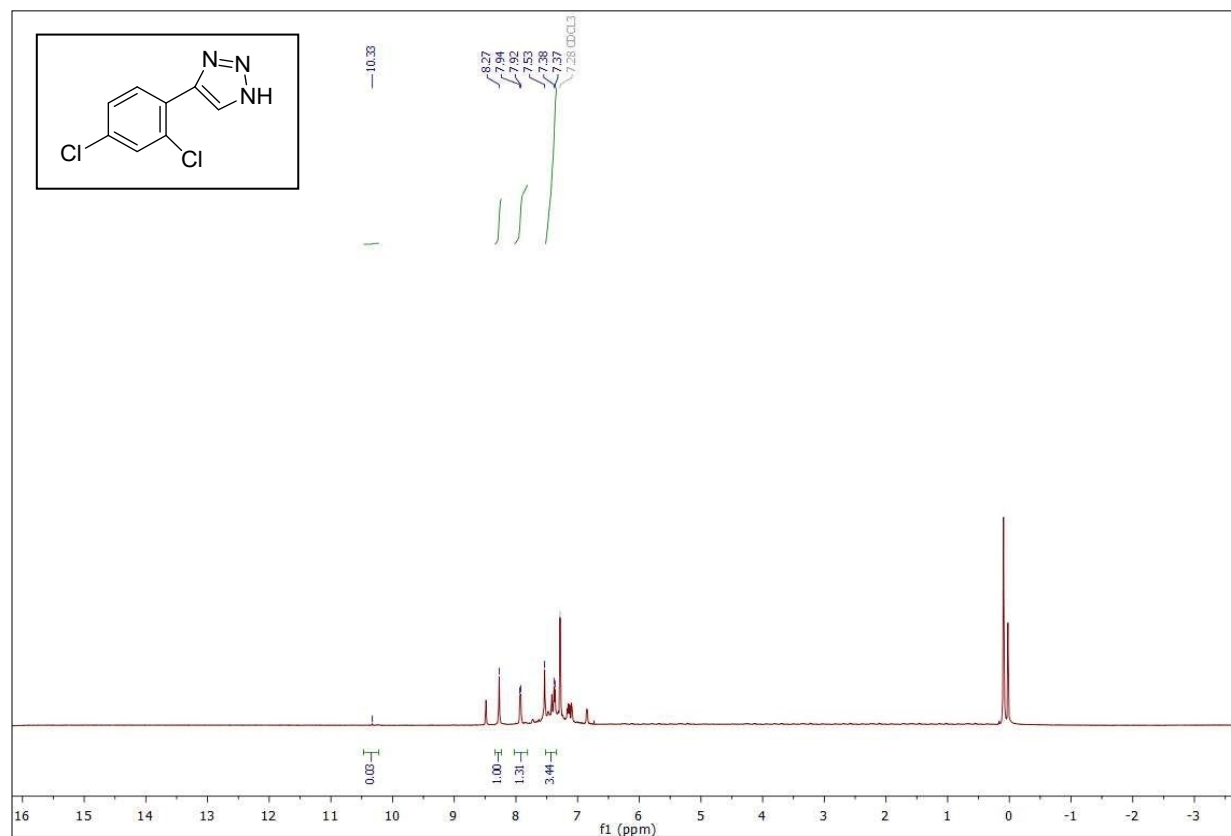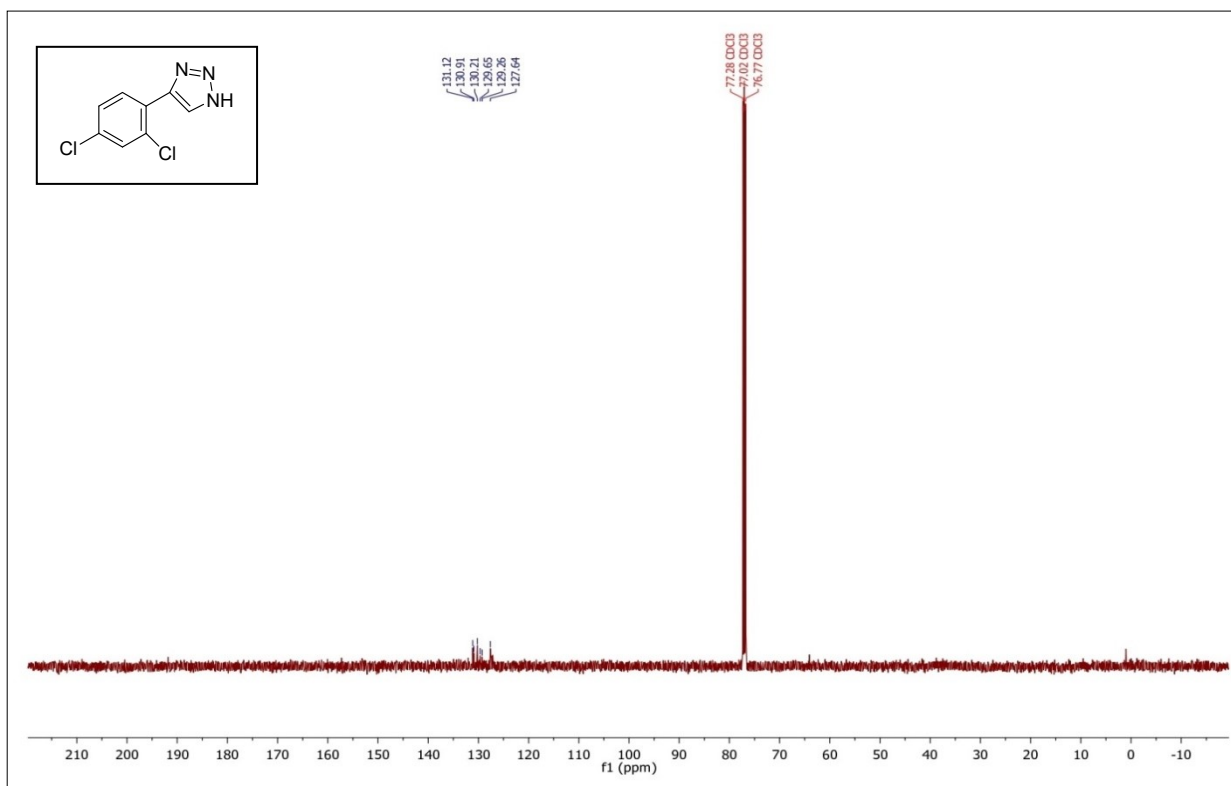

$^1\text{H}$  NMR and  $^{13}\text{C}$  NMR spectra of 4-(2-chloro-6-fluorophenyl)-1H-1,2,3-triazole ( Scheme 1 , Entry 4e) respectively

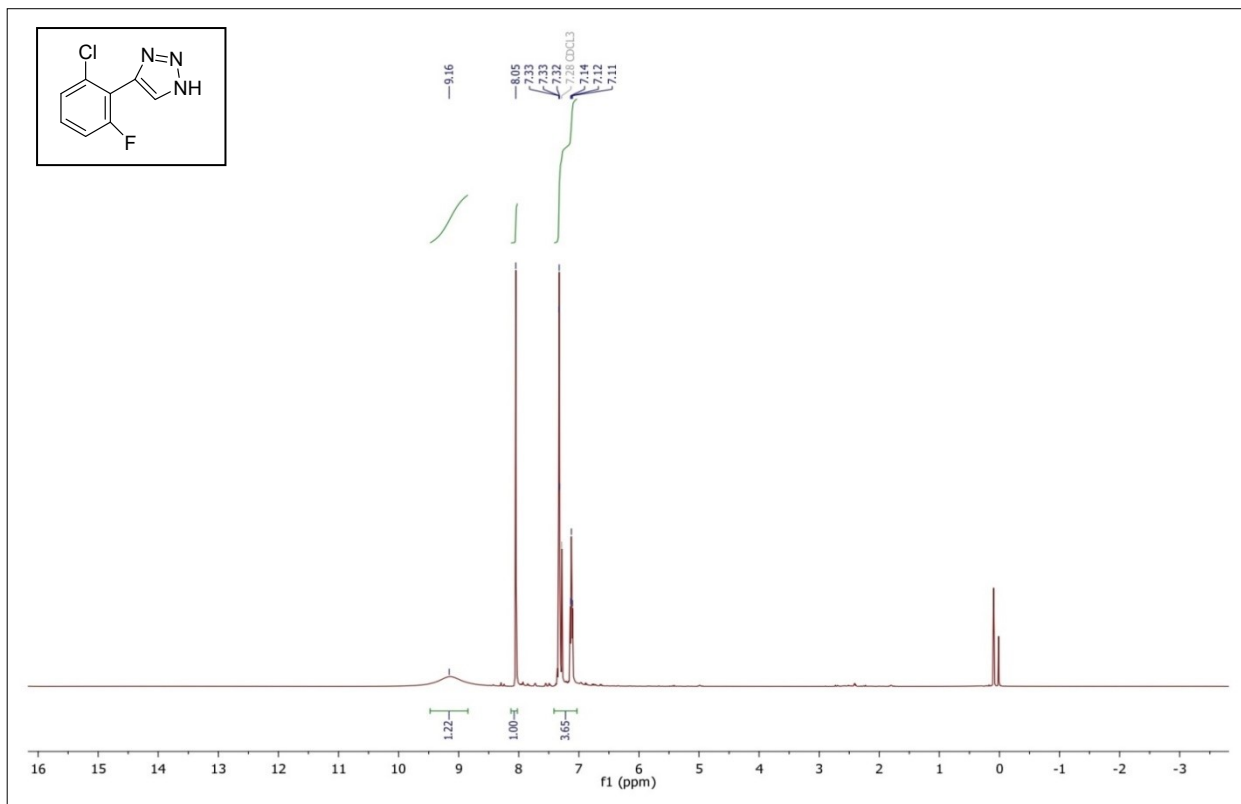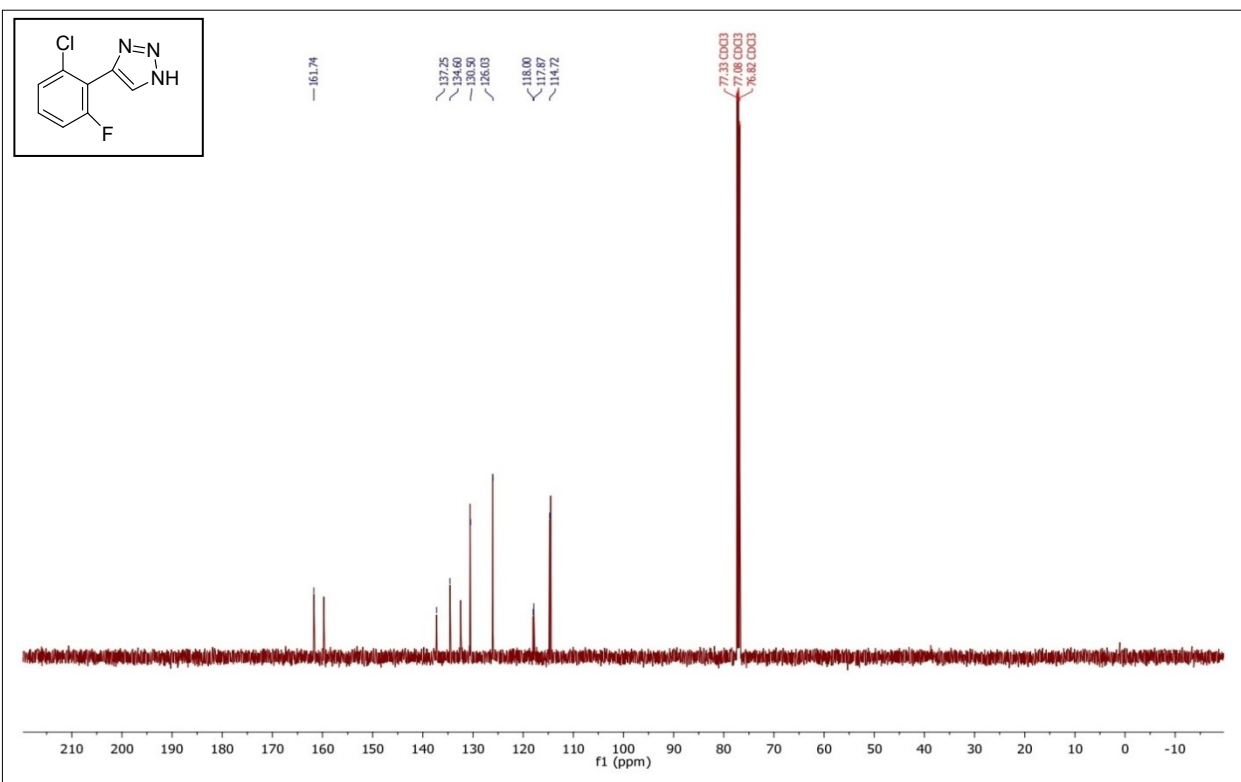

$^1\text{H}$  NMR and  $^{13}\text{C}$  NMR spectra of 4-phenyl-1H-1,2,3-triazole ( **Scheme 1** , **Entry 4f**) respectively

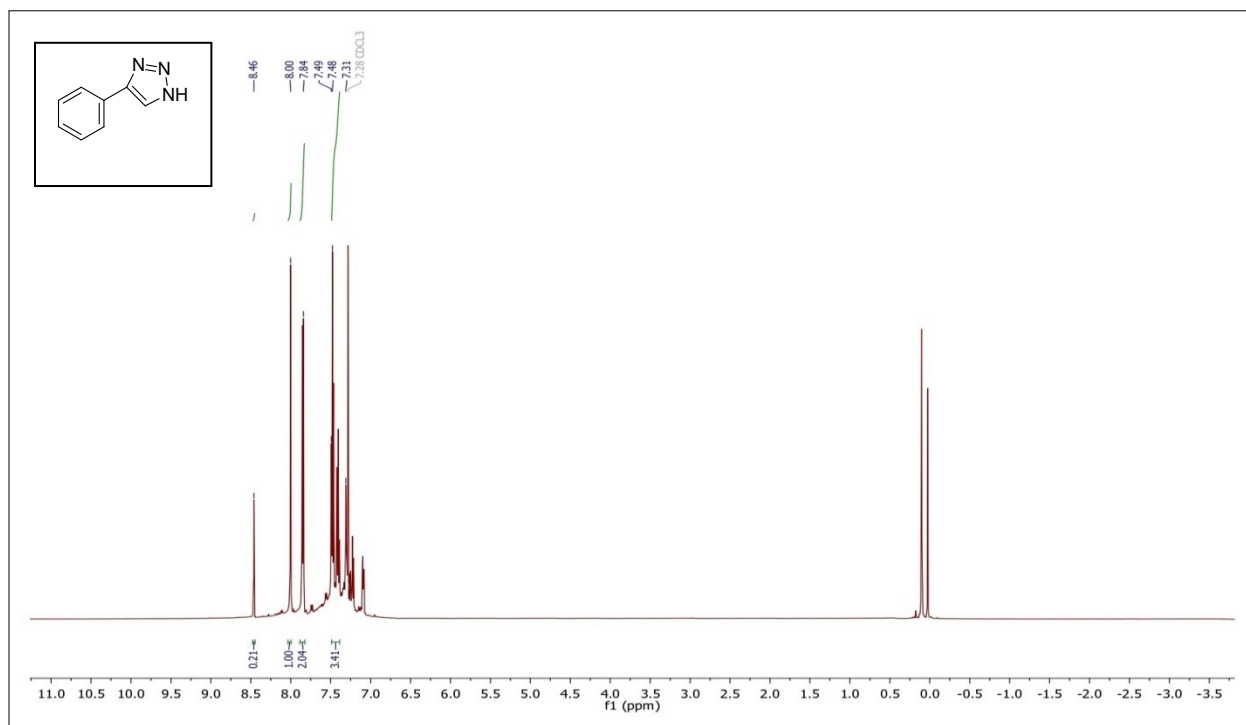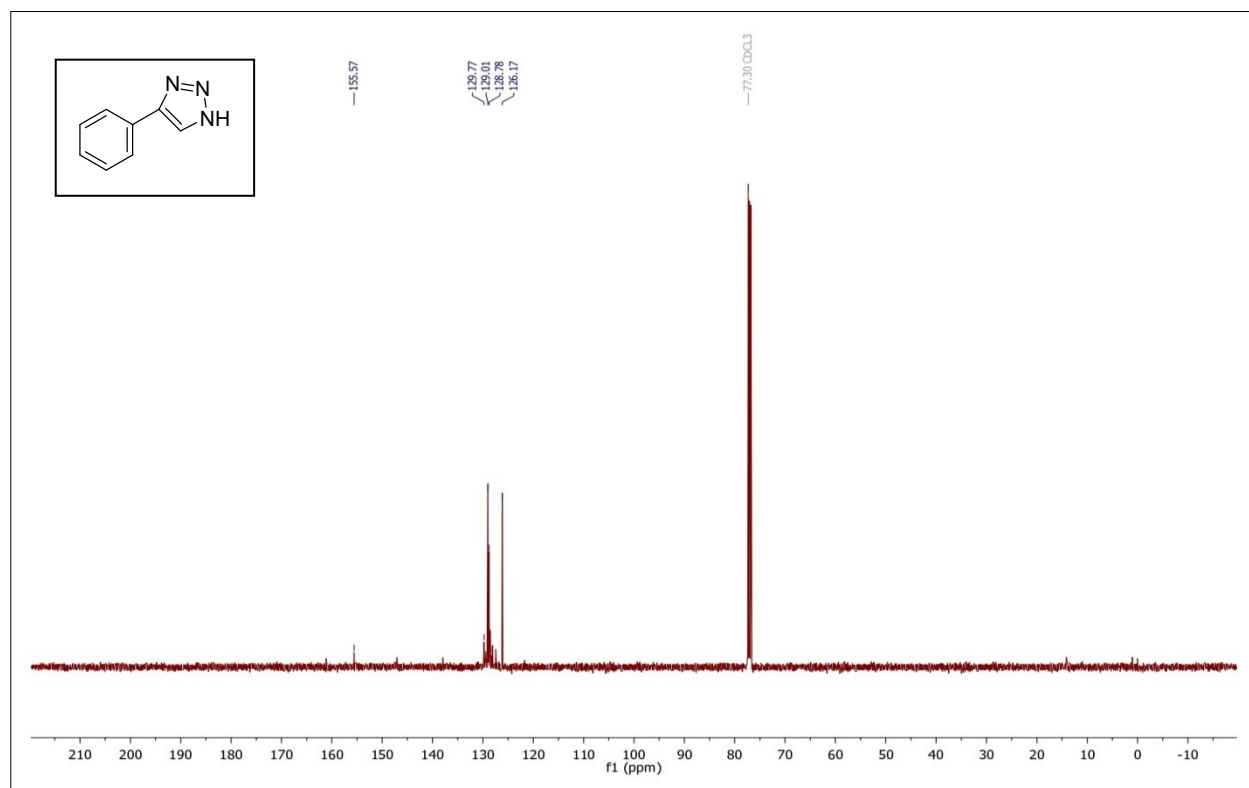

$^1\text{H}$  NMR and  $^{13}\text{C}$  NMR spectra of 4-(2-chlorophenyl)-1H-1,2,3-triazole (Scheme 1, Entry 4d) respectively

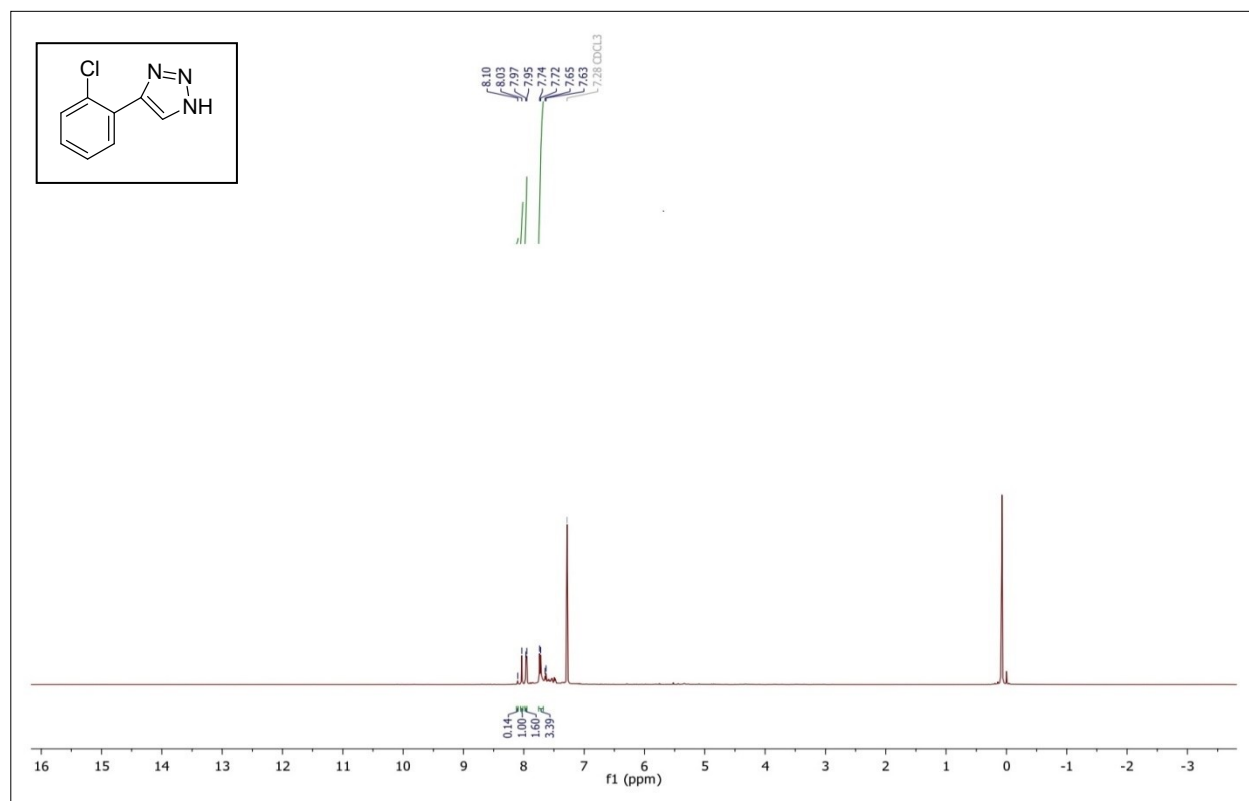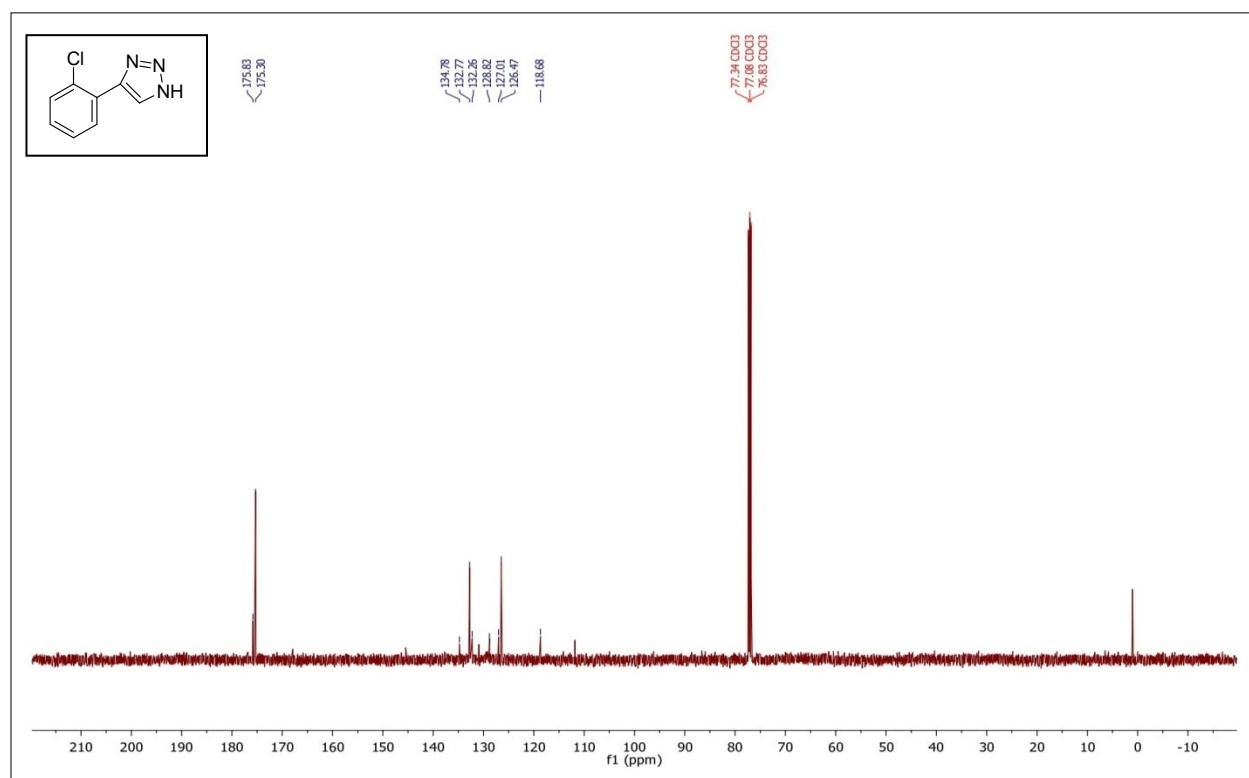

$^1\text{H}$  NMR and  $^{13}\text{C}$  NMR spectra of 4-(4-chlorophenyl)-1H-1,2,3-triazole ( **Scheme 1** , Entry 4a) respectively

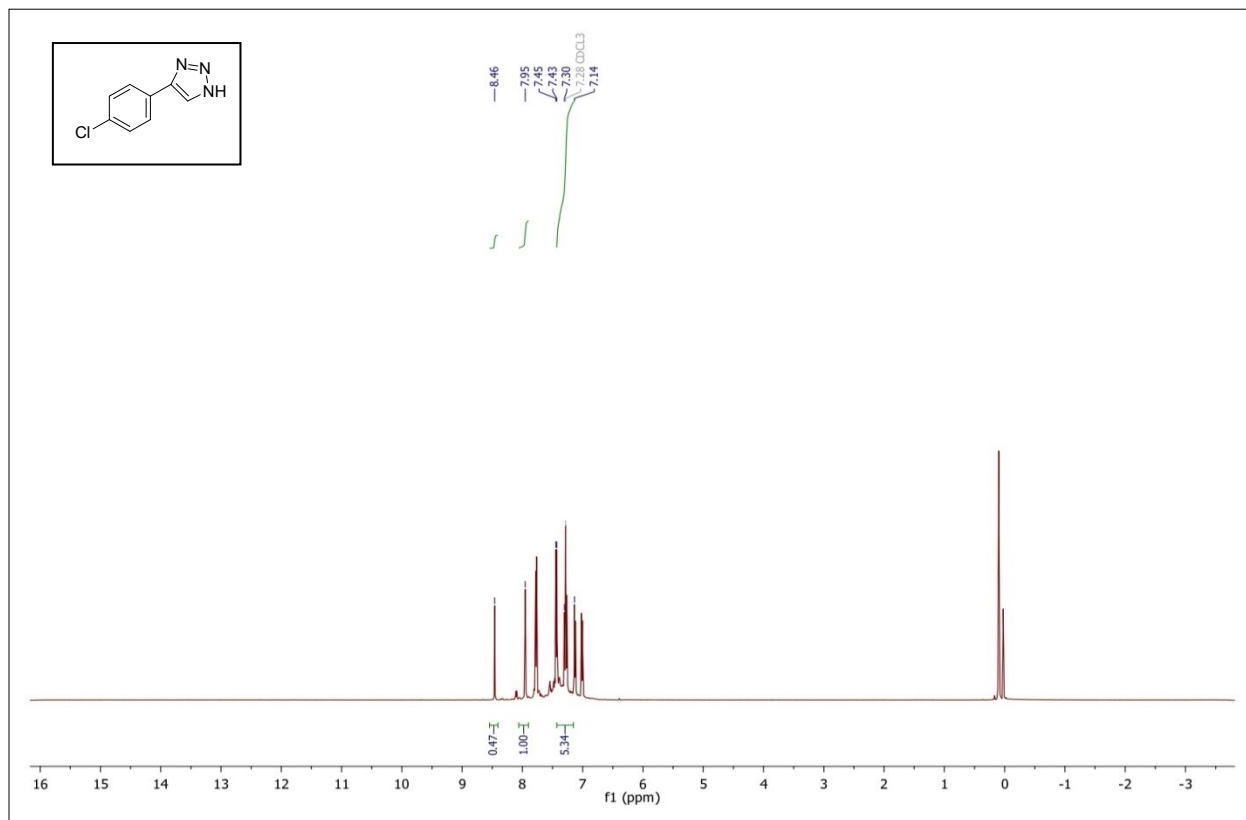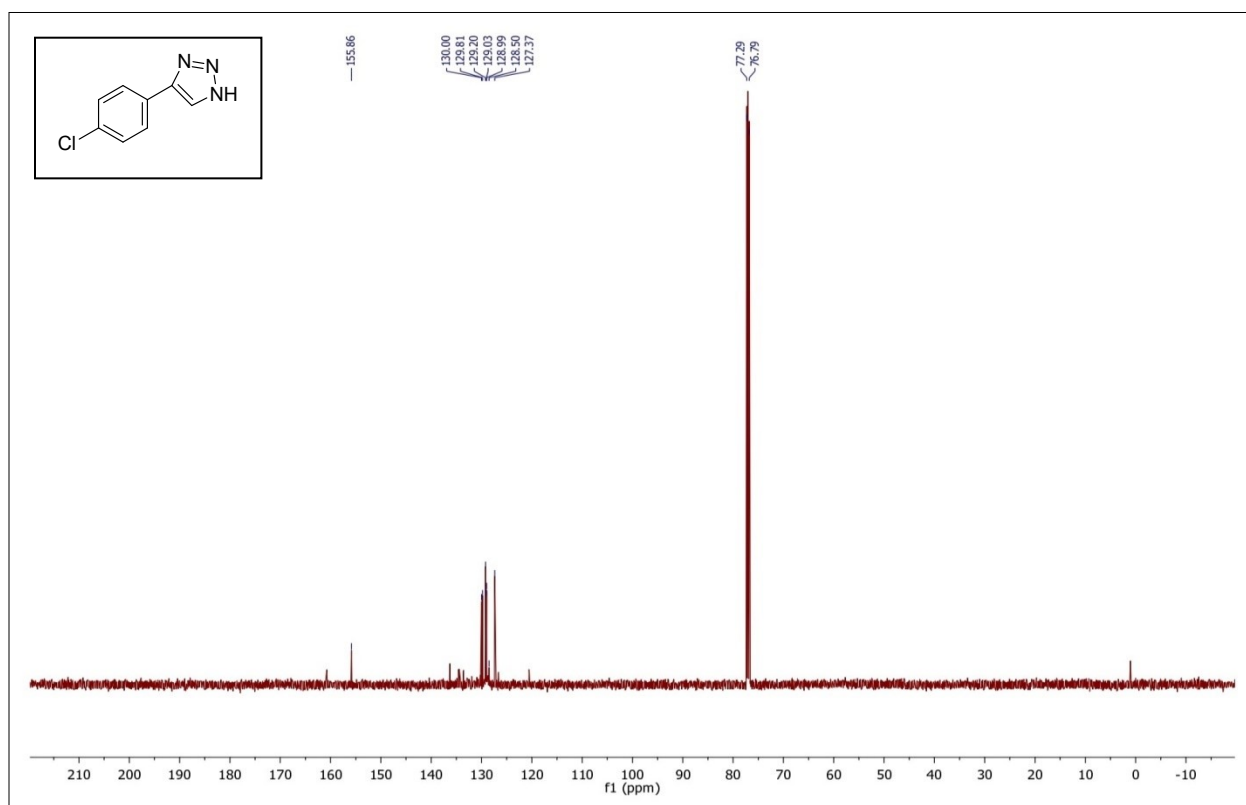



$^1\text{H}$  NMR and  $^{13}\text{C}$  NMR spectra of 4-(4-fluorophenyl)-1H-1,2,3-triazole ( **Scheme 1** , **Entry 4b**) respectively

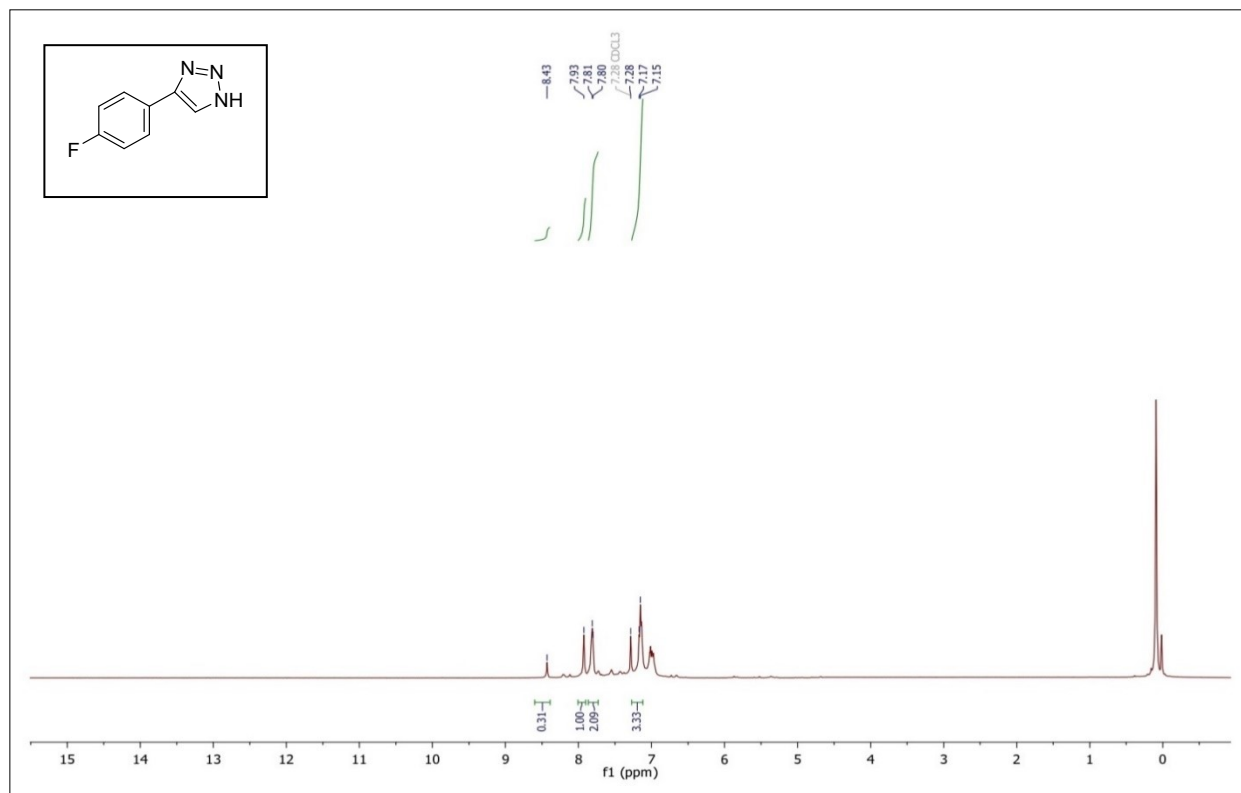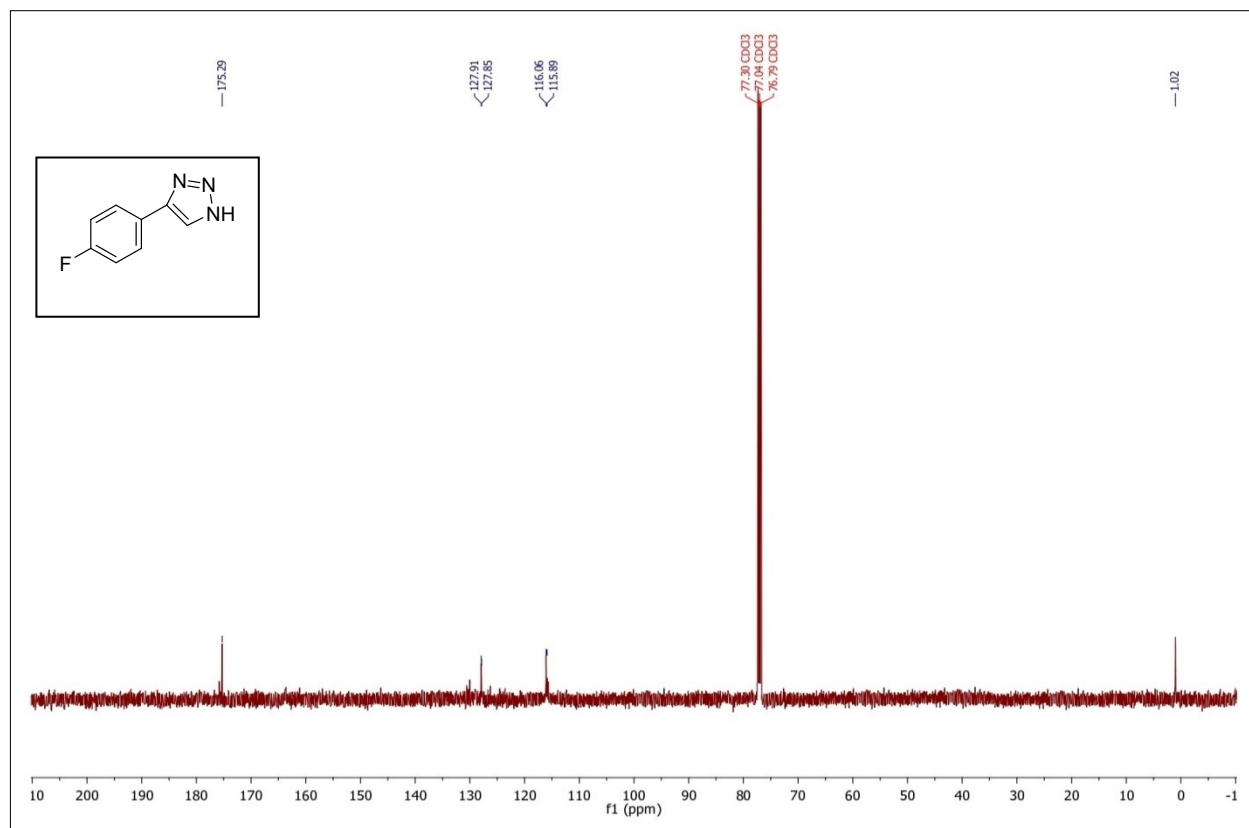

$^1\text{H}$  NMR and  $^{13}\text{C}$  NMR spectra of 4-(furan-2-yl)-1H-1,2,3-triazole ( **Scheme 1** , **Entry 4i**) respectively

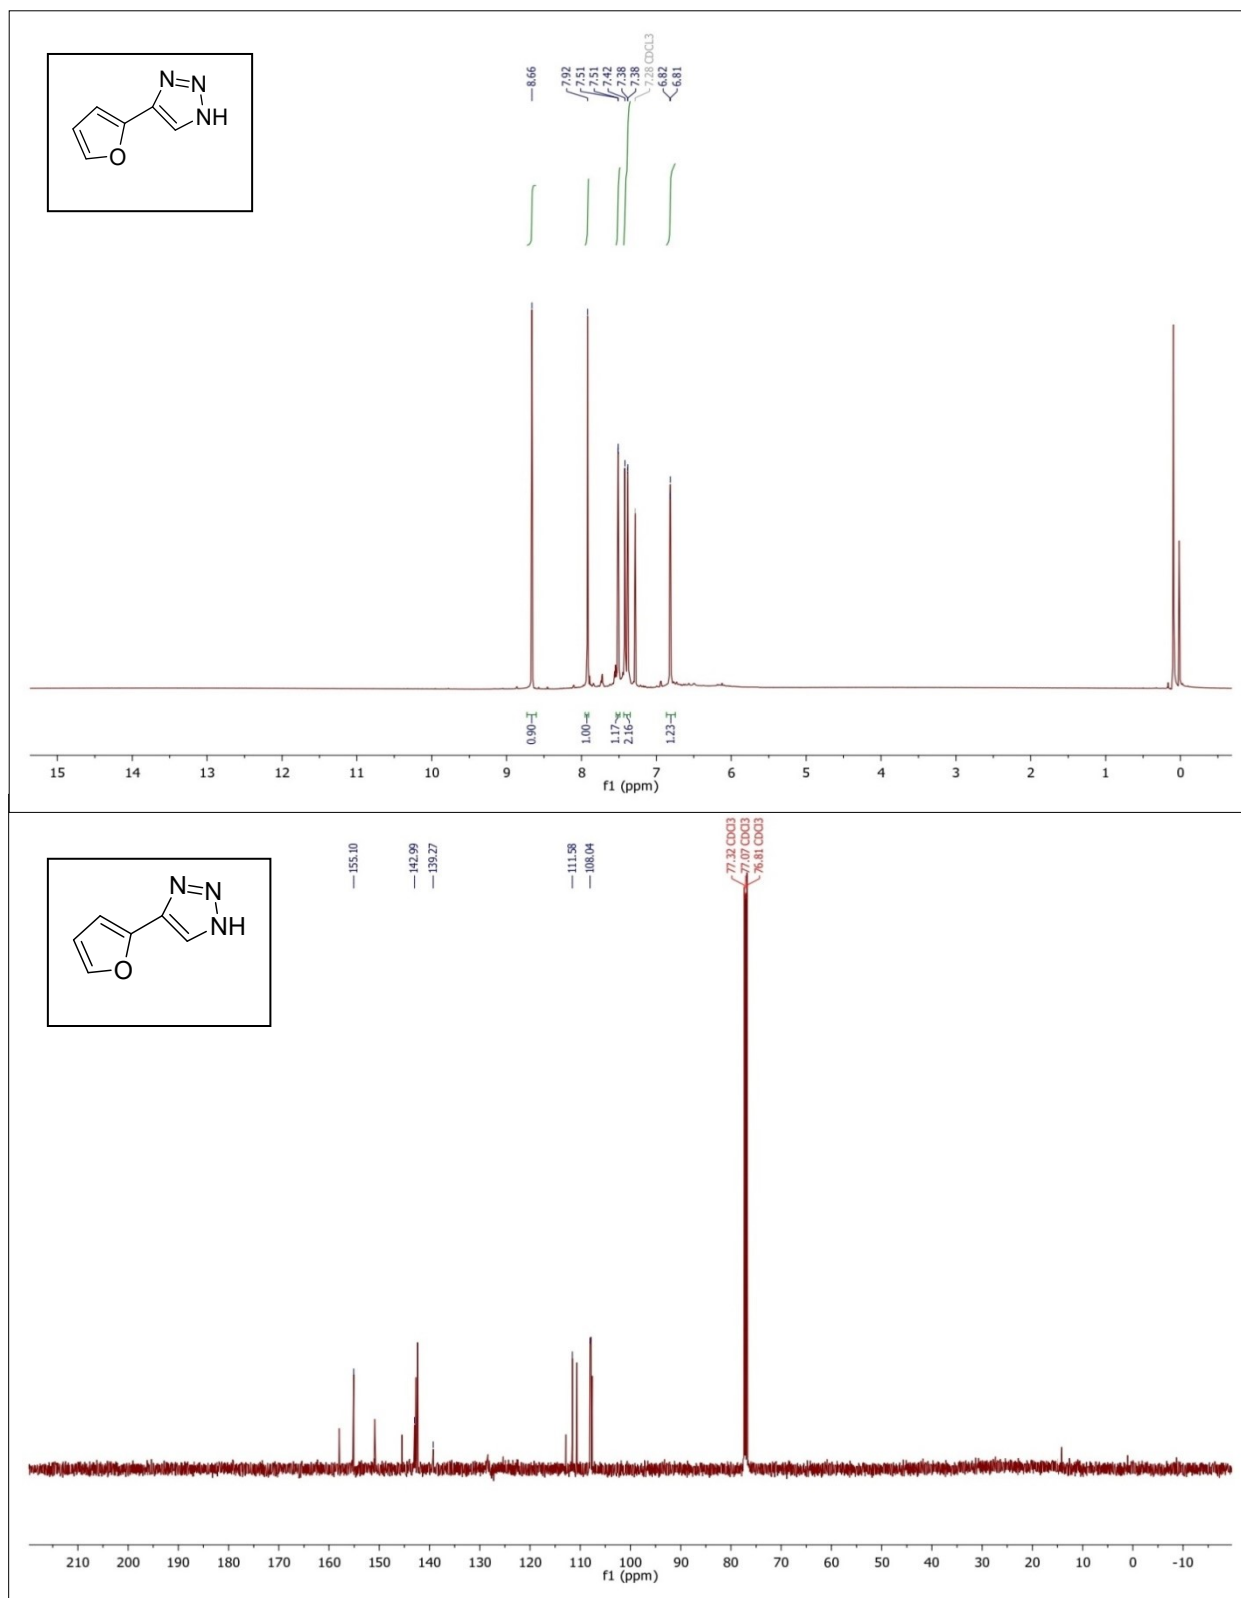

$^1\text{H}$  NMR and  $^{13}\text{C}$  NMR spectra of 4-(p-tolyl)-1H-1,2,3-triazole( **Scheme 1** , **Entry 4h**) respectively

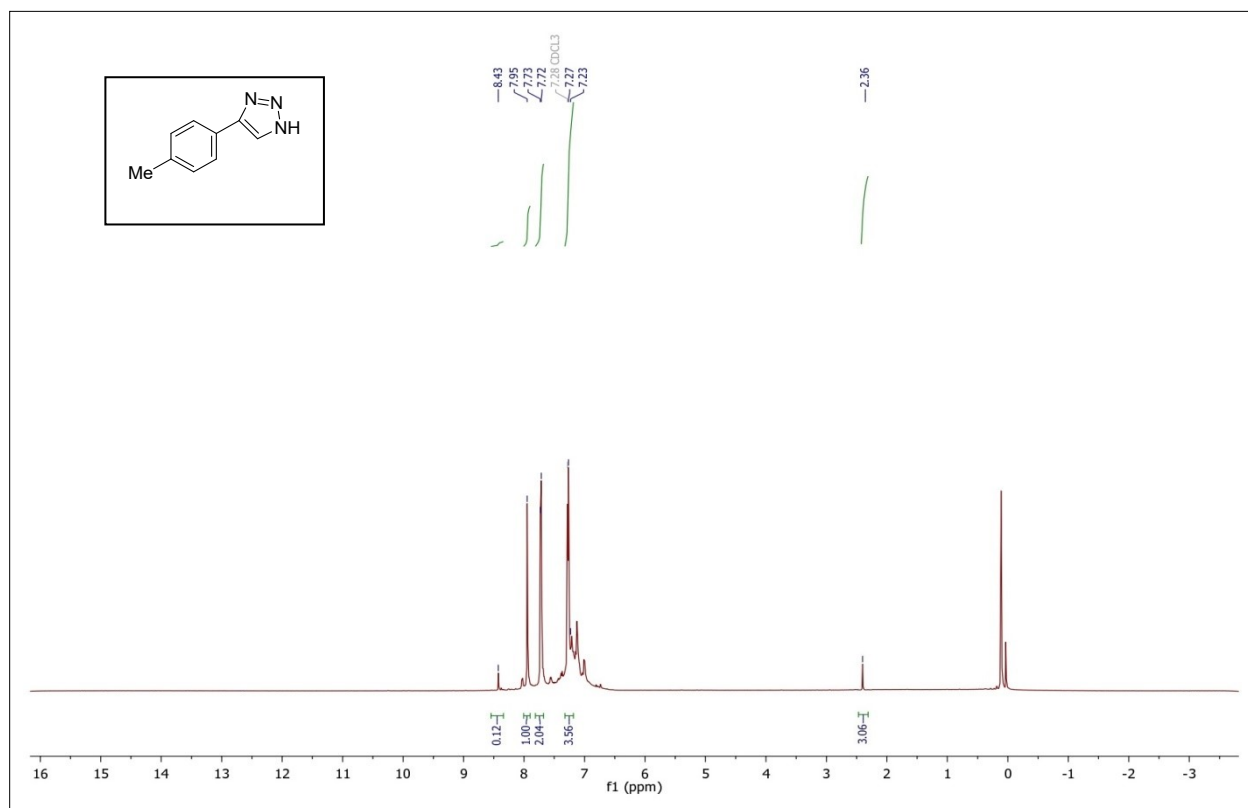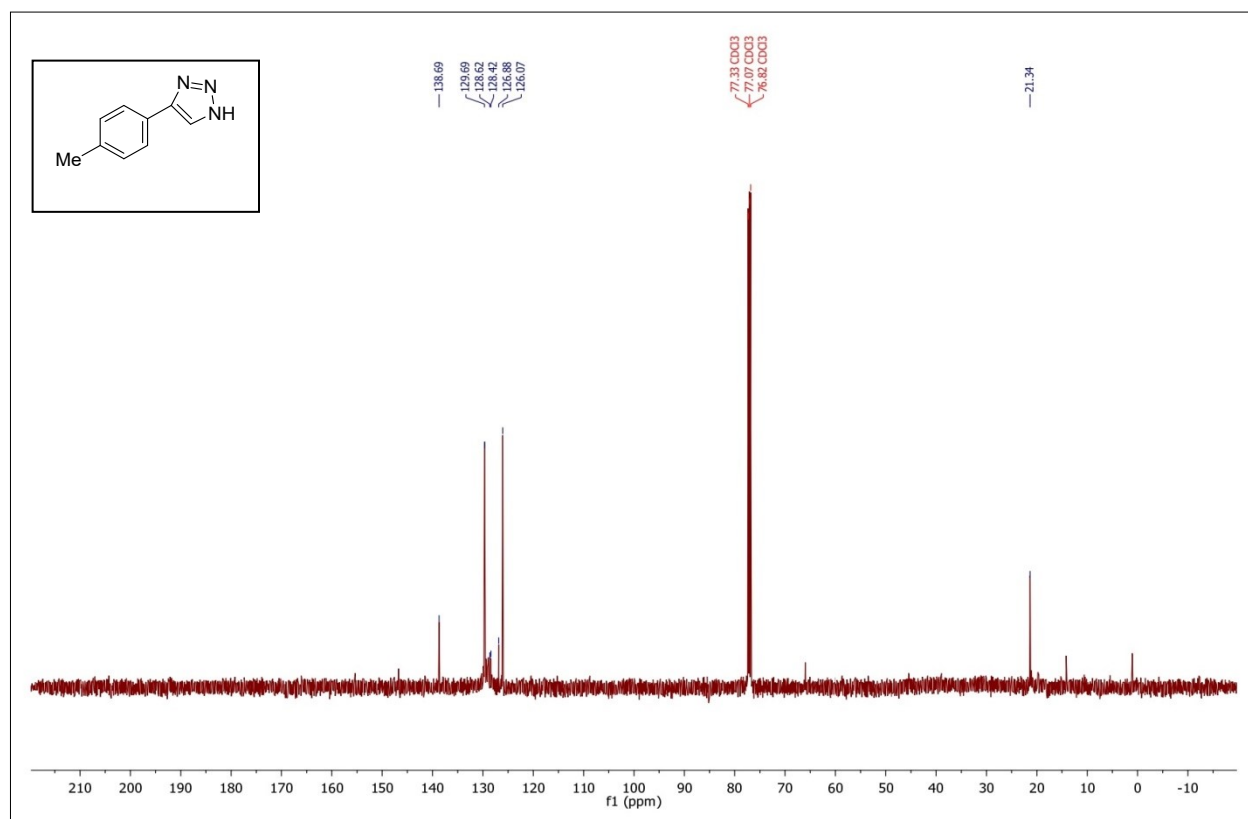

Supplement: d2ma00824f1.pdf [file d2ma00824f1.pdf]
